# Supplementary material for: Role of genetics in amyotrophic lateral sclerosis: a large cohort study in Chinese mainland population
Source: PubMed Central journal article supplement — J Med Genet. 2021 Sep 20;59(9):840–9. doi: 10.1136/jmedgenet-2021-107965 (PMC9411893; doi:10.1136/jmedgenet-2021-107965), 2021-09-20
Supplement: jmedgenet-2021-107965supp001.pdf [file jmedgenet-2021-107965supp001.pdf]

## The role of genetics in amyotrophic lateral sclerosis: a large cohort study in Chinese mainland population

### SUPPLEMENTARY MATERIALS

| Section               | Description                                                                                                                                                                                                                                                        | Pages |
|-----------------------|--------------------------------------------------------------------------------------------------------------------------------------------------------------------------------------------------------------------------------------------------------------------|-------|
| Supplementary methods |                                                                                                                                                                                                                                                                    | 2-7   |
| Supplementary Tables  |                                                                                                                                                                                                                                                                    | 8-25  |
|                       | <b>Table S1.</b> Candidate ALS genes in this study.                                                                                                                                                                                                                | 8-9   |
|                       | <b>Table S2.</b> The geographical distribution of ALS patients.                                                                                                                                                                                                    | 10    |
|                       | <b>Table S3.</b> The ethnical distribution of ALS patients.                                                                                                                                                                                                        | 11    |
|                       | <b>Table S4.</b> The information of 155 ALS patients carried P/LP variants of ALS causative genes.                                                                                                                                                                 | 12-16 |
|                       | <b>Table S5.</b> Top ten variants enriched in ALS by allelic Fisher's exact test.                                                                                                                                                                                  | 17    |
|                       | <b>Table S6.</b> Phenotype and genotype analysis for the GI genes in Chineses ALS cohort.                                                                                                                                                                          | 18    |
|                       | <b>Table S7.</b> phenotype and genotype analysis for the GII genes in Chineses ALS cohort.                                                                                                                                                                         | 19    |
|                       | <b>Table S8.</b> Haplotypes of genetic markers surrounding <i>SOD1</i> in patients harboring p.L39V and p.H47R variants.                                                                                                                                           | 20    |
|                       | <b>Table S9.</b> Haplotypes of genetic markers surrounding <i>FUS</i> in patients harboring p.R521C and p.R521H variants.                                                                                                                                          | 21    |
|                       | <b>Table S10.</b> Haplotypes of genetic markers surrounding <i>TARDBP</i> in patients harboring p.G294V and p.N378D variants.                                                                                                                                      | 22    |
|                       | <b>Table S11.</b> Haplotypes of genetic markers surrounding <i>NEK1</i> in patients harboring p.K214R and p.P807L variants.                                                                                                                                        | 23    |
|                       | <b>Table S12.</b> Haplotypes of genetic markers surrounding <i>ANXA11</i> in patients harboring p.D40G variants.                                                                                                                                                   | 24    |
|                       | <b>Table S13.</b> The number of patients with more than one rare variant of GI and GII genes                                                                                                                                                                       | 25    |
|                       | <b>Table S14.</b> Information of rare variants identified in ALS patients.                                                                                                                                                                                         | *     |
|                       | <b>Table S15.</b> Information of rare variants identified in in-house controls.                                                                                                                                                                                    | *     |
| Supplementary Figures |                                                                                                                                                                                                                                                                    | 26-28 |
|                       | <b>Figure S1.</b> The comparison of ALSFRS-R, diagnosis delay and disease progression at baseline among patients with rare P/LP variants in the GI genes, rare deleterious variants in the GII genes and without rare damaging variants in the GI and GII genes.   | 26    |
|                       | <b>Figure S2.</b> The comparison of age of onset, disease progression and median survival time among patients with more than one variant in the GI genes, only one rare P/LP variants in the GI genes, and without rare damaging variants in the GI and GII genes. | 27    |
|                       | <b>Figure S3.</b> Functional analysis for p.Gly294Val of <i>TARDBP</i> .                                                                                                                                                                                           | 28    |

\*These three supplementary tables were uploaded independently.

## Supplementary methods

### Genetic analysis

#### *DNA preparation, Repeat-primed polymerase chain reaction and whole exome sequencing*

Genomic DNA was collected from peripheral blood leukocytes via standard phenol-chloroform procedures. The repeat-primed polymerase chain reaction (RP-PCR) was performed using triple primers listed in our previous study[1]. The intronic GGGGCC hexanucleotide repeat expansion (HREs) producing a characteristic “saw-tooth” pattern with a 6 base pair periodicity were identified, and more than 30 peaks were considered as potential large expansions. Genomic DNA of previous reported patients with HREs over 30 in *C9ORF72* was used as positive controls. For whole exome sequencing (WES), a total of 5ug DNA was fragmented to an average size of 350 bp using a Covaris LE220-plus Focused-Ultrasonicator, and the DNA library was constructed using a KAPA Library Amplification Kit according to the manufacture’s instruction. WES was then performed using a NovaSeq 5000/6000 S2/S1 reagent kit (Illumina) as per standard protocols.

For WES, clean data were mapped to the reference genome (GRCh37/hg19) to obtain the bam file using the BWA Picard protocol[2]. Genotype calling was performed using Genome Analysis Toolkit’s (GATK) Haplotype Caller software[3].

#### *Sample quality control and variant quality control*

The Samples with a high proportion of chimeric reads (>5%), high contamination (<5%), poor call rates (<90%), mean depth <10 X, or mean genotype-quality <65 were excluded from further analysis.

For variant quality control, we restricted the data to GENCODE coding regions, where Illumina exomes surpassed 10 X mean coverage. The “PASS” variants in GATK’s variant quality score recalibration (VQSR) filter were included in further analysis. In addition, individual genotypes have to meet the following criteria: 1) genotype depth more than 10, 2) the allele balance (alternative allele cover/total allele cover) of heterozygous sites is between 0.2 and 0.8, and of homozygous sites > 0.8, 3) genotype quality (GQ) >20.

#### *Allele frequency categorization*

Allele frequencies were estimated using the public databases, the Exome Aggregation Consortium (ExAC), and the Genome Aggregation Database (GnomAD). We classified variants as rare variants using the following criteria: rare variants have a minor allele frequency (MAF) of  $<0.0001$  in ExAC\_EAS (East Asian) and GnomAD\_EAS.

#### ***Variants annotation***

Variants of all the candidate genes (GI and GII), that met the above criteria were further analyzed. For rare variants, which were annotated as “missense”, “inframe\_deletion”, “inframe\_insertion”, “frameshift”, “stop-gain”, or “splice region” were further classified as “deleterious” or “non-deleterious” based on the following criteria: 1) all nonsense variants (stop-gain) and indels were regarded as deleterious; 2) splice variants were deleterious when they were predicted to affect splicing by at least one of two in silico tools, including Human Splicing Finder[4] and NetGene2[5]; 3) missense variants were only considered deleterious when they were predicted to be damaging by at least three of the 5 following in silico tools: Sorting Intolerant from Tolerant (SIFT)[6], Polymorphism Phenotyping v2 (PolyPhen-2)[7], Mutation Assessor[8], Functional Analysis through Hidden Markov Models (FATHMM)[9], Combined Annotation Dependent Depletion (CADD)[10]. For the known rare variants, pathogenicity as classified in the Clinvar database was considered to be important supporting evidence. Cosegregation analysis of candidate variants was performed on all available family members. Finally, in consideration of the varying degrees of genetic evidence for 41 involved genes in ALS, for the GI genes, rare variants were classified as pathogenic or likely pathogenic(P/LP), variant of uncertain significance (VUS), likely benign or benign according to the American College of Medical Genetics (ACMG) recommendations[11]; for the GII genes, rare variants were classified as deleterious and non-deleterious according to the five functional prediction software (for missense variants), criteria 1 (for nonsense variants) and criteria 2 (for splice variants).

#### ***Burden analysis***

The sequencing kernel association test (SKAT) implemented in R packages AssotesteR were performed on the gene basis for genetic investigations into the collective risk of rare variants

in 40 genes for ALS (except C9orf72). Rare variants from 1866 in-house controls from WES were used as the control group (Figure 1). Rare variants were classified as damaging (P/LP variants in the GI genes and deleterious variants in the GII genes) and non-damaging (VUS, likely benign or benign in the GI genes and non-deleterious in the GII genes) variants in the ALS cohort and controls.

In order to explore which rare P/LP variants in the GI genes might contribute to the risk for ALS, the distribution of minor allele frequencies of rare P/LP variants in the GI genes between patients and controls were compared by standard fisher's exact test by two-stages analysis. In the initial stage, rare P/LP variants in each gene from 1587 cases and 1,866 in-house controls were analyzed, and the same analysis in the secondary stage were conducted including 1587 cases and controls from GnomAD-EAS (n=9977). Because a total of 95 rare P/LP variants in the GI genes were identified in our study, the  $p\text{-value} < 5.3e-4$  ( $0.05/95$ ) was considered statistically significant after Bonferroni correction.

#### ***Haplotype analysis for variants identified in more than one patient***

Due to all the patients involved in this study came from the unrelated families, to distinguish between the presence of a possible founder effect or a mutational hotspot for variants identified in more than one patient, we used polymorphisms-generated haplotypes to establish a common lineage. The SNP array platform used was Illumina Infinium Asian Screening Array-MD v1.0. Samples were processed using the Illumina manufacturer's recommended protocol. Genotyping and quality control were detailly were described in our previous study[12]. Haplotypes segregating with the disease were constructed to identify a possible ancestral haplotype.

#### **Plasmid construction**

The full-length cDNA of *TARDBP* was synthesized and separately cloned into pCMV-MCS vectors containing a 3\*FLAG tag sequence. The mutations of G294V was generated from pCMV-MCS -3\*Flag-TARDBP by the Q5® Site-Directed Mutagenesis Kit (NEB, USA, #E0554S).

#### **Cell Culture and Transfection**

HEK293T cells was obtained from the American Type Culture Collection (ATCC CRL-11268), which were cultured with Dulbecco's modified Eagle's medium (Sigma) supplemented with 10% fetal calf serum (Life Technologies). Cells were maintained in a humidified incubator at 37°C and 5% CO<sub>2</sub>. The plasmids were transfected with Lipofectamine 3000 (Invitrogen) for cell lines according to the manufacturer's protocol. After 48 h, transfected cells were collected for following experiments.

### **Immunofluorescence**

Cells were fixed in 4% paraformaldehyde for 15 min and permeabilized with 0.3% Triton X-100 for 5 min. Cells were blocked with 5% bovine serum albumin for 30 min and incubated with primary antibodies overnight at 4°C. Mouse anti-FLAG (1:1000, Sigma cat# F1804) were used as primary antibodies. After incubation with the primary antibody, cells were washed three times with PBS, incubated with Alexa Fluor secondary antibodies (Invitrogen, 1:500) for 1 h at room temperature, and mounted with Vectashield hard-set mounting medium with DAPI (Vector Laboratories). Images were acquired using a laser scanning confocal microscope (Olympus).

### **Flow cytometric analysis**

The Annexin V-FITC/PI (556547, BD, America) assay kit was used to detect the apoptosis. The experiments were conducted according to the user instructions. For apoptosis assay, after digesting by trypsin, the HEK-293T cells were collected and then washed twice with cold PBS. Subsequently, the cells were suspended by 400 µl Annexin V binding fluid, making the cell concentration  $1 \times 10^6$  cells/ml. The cells suspension was then added into 5 µl Annexin V-FITC dyed liquid and incubated at 37°C for 15mins. After that, the cells suspension was added into 10 µl PI dyed liquid and incubated at 37°C for 5 min. Lastly, the samples were analyzed by cytomics FC 500 (Beckman, America).

### **References:**

1. Chen Y, Lin Z, Chen X, Cao B, Wei Q, Ou R, Zhao B, Song W, Wu Y, Shang HF. Large C9orf72 repeat expansions are seen in Chinese patients with sporadic amyotrophic lateral sclerosis. *Neurobiol Aging* 2016;**38**:217 e15-17 e22 doi: 10.1016/j.neurobiolaging.2015.11.016published Online First: Epub Date].

2. Li H, Durbin R. Fast and accurate short read alignment with Burrows-Wheeler transform. *Bioinformatics* 2009;**25**(14):1754-60 doi: 10.1093/bioinformatics/btp324published Online First: Epub Date]].
3. McKenna A, Hanna M, Banks E, Sivachenko A, Cibulskis K, Kernytsky A, Garimella K, Altshuler D, Gabriel S, Daly M, DePristo MA. The Genome Analysis Toolkit: a MapReduce framework for analyzing next-generation DNA sequencing data. *Genome Res* 2010;**20**(9):1297-303 doi: 10.1101/gr.107524.110published Online First: Epub Date]].
4. Desmet FO, Hamroun D, Lalande M, Collod-Beroud G, Claustres M, Beroud C. Human Splicing Finder: an online bioinformatics tool to predict splicing signals. *Nucleic Acids Res* 2009;**37**(9):e67 doi: 10.1093/nar/gkp215published Online First: Epub Date]].
5. Hebsgaard SM, Korning PG, Tolstrup N, Engelbrecht J, Rouze P, Brunak S. Splice site prediction in *Arabidopsis thaliana* pre-mRNA by combining local and global sequence information. *Nucleic Acids Res* 1996;**24**(17):3439-52 doi: 10.1093/nar/24.17.3439published Online First: Epub Date]].
6. Ng PC, Henikoff S. SIFT: Predicting amino acid changes that affect protein function. *Nucleic Acids Res* 2003;**31**(13):3812-4 doi: 10.1093/nar/gkg509published Online First: Epub Date]].
7. Adzhubei IA, Schmidt S, Peshkin L, Ramensky VE, Gerasimova A, Bork P, Kondrashov AS, Sunyaev SR. A method and server for predicting damaging missense mutations. *Nat Methods* 2010;**7**(4):248-9 doi: 10.1038/nmeth0410-248published Online First: Epub Date]].
8. Reva B, Antipin Y, Sander C. Predicting the functional impact of protein mutations: application to cancer genomics. *Nucleic Acids Res* 2011;**39**(17):e118 doi: 10.1093/nar/gkr407published Online First: Epub Date]].
9. Shihab HA, Gough J, Cooper DN, Stenson PD, Barker GL, Edwards KJ, Day IN, Gaunt TR. Predicting the functional, molecular, and phenotypic consequences of amino acid substitutions using hidden Markov models. *Hum Mutat* 2013;**34**(1):57-65 doi: 10.1002/humu.22225published Online First: Epub Date]].
10. Rentzsch P, Witten D, Cooper GM, Shendure J, Kircher M. CADD: predicting the deleteriousness of variants throughout the human genome. *Nucleic Acids Res* 2019;**47**(D1):D886-D94 doi: 10.1093/nar/gky1016published Online First: Epub Date]].
11. Richards S, Aziz N, Bale S, Bick D, Das S, Gastier-Foster J, Grody WW, Hegde M, Lyon E, Spector E, Voelkerding K, Rehm HL, Committee ALQA. Standards and guidelines for the interpretation of sequence variants: a joint consensus recommendation of the American College of Medical Genetics and Genomics and the Association for Molecular Pathology. *Genet Med* 2015;**17**(5):405-24 doi: 10.1038/gim.2015.30published Online First: Epub Date]].
12. Li C, Ou R, Chen Y, Gu X, Wei Q, Cao B, Zhang L, Hou Y, Liu K, Chen X, Song W, Zhao B, Wu Y, Li T, Dong X, Shang H. Genetic Modifiers of Age at Onset for Parkinson's Disease in Asians:

A Genome-Wide Association Study. *Mov Disord* 2021 doi: 10.1002/mds.28621published  
Online First: Epub Date]].

**Table S1. Candidate ALS genes in this study**

| Genes                                                                    | Protein                                                  | ALS      | Inheritance | Locus    | Refseq NM      | OMIM*  | PLI  | First reported in ALS/FTD |
|--------------------------------------------------------------------------|----------------------------------------------------------|----------|-------------|----------|----------------|--------|------|---------------------------|
| <b>Group 1 (GI, Well established causative genes)</b>                    |                                                          |          |             |          |                |        |      |                           |
| <i>SOD1</i>                                                              | Superoxide dismutase 1                                   | ALS1     | AD/AR       | 21q22.11 | NM_000454.4    | 105400 | 0.18 | Nature. 1993              |
| <i>FUS</i>                                                               | Fused in sarcoma                                         | ALS6     | AD          | 16p11.2  | NM_004960.3    | 608030 | 1.00 | Science.2009              |
| <i>VAPB</i>                                                              | Vesicle-associated membrane protein-associated protein B | ALS8     | AD          | 20q13.32 | NM_004738.5    | 608627 | 0.58 | Am J Hum Genet. 2004      |
| <i>TARDBP</i>                                                            | TAR DNA-Binding Protein, 43-Kd                           | ALS10    | AD          | 1q36.22  | NM_007375.3    | 612069 | 0.99 | Science. 2008             |
| <i>OPTN</i>                                                              | Optineurin                                               | ALS12    | AD          | 10p13    | NM_021980.4    | 613435 | 0    | Nature. 2010              |
| <i>VCP</i>                                                               | Valosin Containing Protein                               | ALS14    | AD          | 9p13.3   | NM_007126.5    | 613954 | 1.00 | Neuron. 2010              |
| <i>UBQLN2</i>                                                            | Ubiquilin-2                                              | ALS15    | X-linked AD | Xp11.21  | NM_013444.3    | 300857 | 0.85 | Nature. 2011              |
| <i>C9orf72</i>                                                           | Guanine nucleotide exchange C9orf72                      | ALS-FTD1 | AD          | 9p21.2   | NM_001256054.2 | 105550 |      | Neuron.2011               |
| <i>PFN1</i>                                                              | Profilin 1                                               | ALS18    | AD          | 17p13.2  | NM_005022.4    | 614808 | 0.73 | Nature. 2012              |
| <i>HNRNPA1</i>                                                           | Heterogeneous nuclear ribonucleoprotein A1               | ALS20    | AD          | 12q13.13 | NM_031157.4    | 615426 | 1    | Nature. 2013              |
| <i>CHCHD10</i>                                                           | Coiled-coil-helix-domain containing protein 10           | ALS-FTD2 | AD          | 22q11.23 | NM_213720.2    | 615911 | 0    | Brain. 2014               |
| <i>TBK1</i>                                                              | Tank-binding kinase 1                                    | ALS-FTD4 | AD          | 12q14.2  | NM_013254.3    | 616439 | 0.08 | Science. 2015             |
| <i>NEK1</i>                                                              | Never in mitosis gene A-related kinase 1                 | ALS24    | AD          | 4q33     | NM_012224.2    | 617892 | 0    | Brain. 2016               |
| <i>ANXA11</i>                                                            | Annexin 11                                               | ALS23    | AD          | 10q22.3  | NM_001157.2    | 617839 | 0    | Sci Trans Med. 2017       |
| <i>KIF5A</i>                                                             | Kinesin family member 5A                                 | ALS25    | AD          | 12q13.3  | NM_004984.3    | 617921 | 1    | Neuron. 2018              |
| <i>DNAJC7<sup>#</sup></i>                                                | DNAJ/HSP40 homolog, subfamily C, member 7                | -        | AD          | 17q21.2  | NM_003315.3    | -      | 0.99 | Nat Neurosci. 2019        |
| <b>Group 2 (GII, new, needing to be confirmed genes, or risk factor)</b> |                                                          |          |             |          |                |        |      |                           |
| <i>NEFH</i>                                                              | Neurofilament heavy                                      | -        | AD, AR      | 22q12.2  | NM_021076.3    | 105400 | 0    | Nature. 1995              |
| <i>MAPT</i>                                                              | microtubule associated protein tau                       | -        | -           | 17q21.31 | NM_016835.4    | 600274 | 0.01 | Ann Neurol. 1997          |
| <i>ALS2</i>                                                              | Amyotrophic lateral sclerosis 2, ALS2                    | ALS2     | AR          | 2q33.1   | NM_020919.4    | 205100 | 1.00 | Nat Genet. 2001           |
| <i>SETX</i>                                                              | Sentaxin                                                 | ALS4     | AD          | 9q34.13  | NM_015046.5    | 602433 | 0.95 | Am J Hum Genet. 2004      |
| <i>DCTN1</i>                                                             | Dynactin subunit 1                                       | ALS      | AD/AR       | 2q13     | NM_004082.4    | 105400 | 0.08 | Neurology. 2004           |



|                  |                                                   |          |        |          |                |        |      |                      |
|------------------|---------------------------------------------------|----------|--------|----------|----------------|--------|------|----------------------|
| <i>PRPH</i>      | Peripherin                                        | -        | AD, AR | 12q13.12 | NM_006262.3    | 105400 | 0    | J Biol Chem. 2004    |
| <i>ANG</i>       | Angiogenin                                        | ALS9     | AD     | 14q11.2  | NM_001145.4    | 611895 | 0.29 | Nat Genet. 2006      |
| <i>GRN</i>       | granulin precursor                                | -        | AD     | 17q21.31 | NM_002087.3    | 607485 | 0.07 | Nature 2006          |
| <i>CHMP2B</i>    | Charged multivesicular body protein 2b            | ALS17    | AD     | 3p11.2   | NM_014043.4    | 614676 | 0    | Neurology. 2006      |
| <i>PNPLA6</i>    | patatin like phospholipase domain containing 6    | -        | -      | 19p13.2  | NM_006702.5    | -      | 0    | Am J Hum Genet. 2008 |
| <i>ELP3</i>      | elongator acetyltransferase complex subunit 3     | -        | -      | 8p21.1   | NM_001284220.2 | -      | 0    | Hum Mol Genet. 2009  |
| <i>FIG4</i>      | Polyphosphoinositide 5- phosphatase               | ALS11    | AD     | 6q21     | NM_014845.5    | 612577 | 0    | Am J Hum Genet. 2009 |
| <i>DAO</i>       | D-amino-acid oxidase                              | ALS      | AD     | 12q24.11 | NM_001917.5    | -      | 0    | PNAS. 2010           |
| <i>SIGMAR1</i>   | Sigma non-opioid intracellular receptor           | ALS16    | AR     | 9p13.3   | NM_005866.4    | 614373 | 0.17 | Ann Neurol. 2010     |
| <i>SPG11</i>     | Spatacin                                          | ALS5     | AR     | 15q21.1  | NM_025137.4    | 602099 | 0.44 | Brain. 2010          |
| <i>SQSTM1</i>    | Sequestosome-1                                    | ALS-FTD3 | AD     | 5q35.3   | NM_003900.4    | 616437 | 0    | Arch Neurol. 2011    |
| <i>EWSR1</i>     | protein associated factor 15                      | -        | -      | 17q12    | NM_139215.3    | -      | 0.17 | Hum Mol Genet. 2012  |
| <i>HNRNPA2B1</i> | Heterogeneous nuclear ribonucleoprotein A2/B1     | ALS-FTD  | AD     | 7p15.2   | NM_002137.4    | -      | 1    | Nature. 2013         |
| <i>ERBB4</i>     | Erb-b2 receptor tyrosine kinase 4                 | ALS19    | AD     | 2q34     | NM_005235.3    | 615515 | 1    | Am J Hum Genet. 2013 |
| <i>MATR3</i>     | Martrin 3                                         | ALS21    | AD     | 5q31.2   | NM_199189.2    | 606070 | 1    | Nat Neurosci. 2014   |
| <i>TUBA4A</i>    | Tubulin, alpha-4A                                 | ALS22    | AD     | 2q35     | NM_006000.2    | 616208 | 0.16 | Neuron. 2014         |
| <i>CCNF</i>      | Cyclin F                                          | -        | AD     | 16p13.3  | NM_001761.2    | -      | 0.13 | Nat Commun. 2016     |
| <i>TIA1</i>      | Cytotoxic granule-associated RNA binding protein  | -        | AD     | 2p13.3   | NM_022173.3    | -      | 0.27 | Neuron. 2017         |
| <i>GLT8D1</i>    | Glycosyltransferase 8 domain-containing protein 1 | -        | AD     | 3p21.1   | NM_152932.2    | -      | 0    | Cell Rep. 2019       |
| <i>CYLD</i>      | CYLD lysine-6 deubiquitinase                      | -        | AD     | 16q12.1  | NM_015247.2    | -      | 1    | Brain. 2020          |

\*phenotype MIM number; #new gene having been identified by burden testing; pLI, probability of loss of function intolerance

**Table S2. The geographical distribution of ALS patients.**

| Regions          | N    | Sex(M/F) |
|------------------|------|----------|
| Sichuan          | 1293 | 760/533  |
| Chongqing        | 81   | 38/43    |
| Guizhou          | 46   | 30/16    |
| Yunnan           | 45   | 22/23    |
| Gansu            | 24   | 14/10    |
| Xizang           | 19   | 14/5     |
| Hubei            | 11   | 5/6      |
| Henan            | 10   | 4/6      |
| Xinjiang         | 8    | 4/4      |
| Jiangxi          | 7    | 5/2      |
| Shandong         | 6    | 3/3      |
| Other provinces* | 35   | 20/15    |
| Unknown          | 3    | 3/0      |
| Total            | 1587 | 922/665  |

\*Other provinces including Shaanxi, Anhui, Hebei, Guangxi, Helongjiang, Jiangsu, Liaoning, Hunan, Qinghai, Shanxi, Zhejiang, Jilin, Fujian, Inner Mongolia.

**Table S3. The ethnical distribution of ALS patients.**

| Race   | N    | Sex(M/F) |
|--------|------|----------|
| Han    | 1530 | 889/641  |
| Zang   | 30   | 19/11    |
| Yi     | 6    | 3/3      |
| Qiang  | 5    | 3/2      |
| Hui    | 3    | 1/2      |
| Buyi   | 3    | 1/2      |
| Miao   | 2    | 1/1      |
| Tu     | 2    | 1/1      |
| Li     | 1    | 1/0      |
| Man    | 1    | 1/0      |
| Naxi   | 1    | 0/1      |
| Yao    | 1    | 1/0      |
| Dong   | 1    | 0/1      |
| Zhuang | 1    | 1/0      |
| Total  | 1587 | 922/665  |

**Table S4. The information of 155 ALS patients carried P/LP variants of ALS causative genes**

| No. | Case ID | ALS  | Genes | Chromosomal Position | Refseq ID   | Ex on | cDNA change | Amino Acid change | Variant Type | dbSNPs       | In house controls | ExAC EAS | GnomA D EAS | Classification | Sex | AAO  | FH | ACE R | Status | Duration |
|-----|---------|------|-------|----------------------|-------------|-------|-------------|-------------------|--------------|--------------|-------------------|----------|-------------|----------------|-----|------|----|-------|--------|----------|
| 1   | 2713    | ALS1 | SOD1  | chr21:33032095       | NM_000454.4 | 1     | c.13G>A     | p.Ala5Thr         | missense     | rs121912444  | 0                 | 0        | 0           | P              | M   | 57.1 | AD | 94    | Death  | 47.1     |
| 2   | 3001    | ALS1 | SOD1  | chr21:33032096       | NM_000454.4 | 1     | c.14C>T     | p.Ala5Val         | missense     | rs121912442  | 0                 | 0        | 0           | P              | F   | 54.6 | No | -     | Death  | 14.2     |
| 3   | 3512    | ALS1 | SOD1  | chr21:33032098       | NM_000454.4 | 1     | c.16G>T     | p.Val6Leu         | missense     | -            | 0                 | -        | -           | LP             | F   | 63.3 | No | 83    | Alive  | 25.9     |
| 4   | 298     | ALS1 | SOD1  | chr21:33036125       | NM_000454.4 | 2     | c.95T>C     | p.Val32Ala        | missense     | -            | 0                 | -        | -           | LP             | F   | 46.4 | No | -     | Death  | 168.4    |
| 5   | 728     | ALS1 | SOD1  | chr21:33036145       | NM_000454.4 | 2     | c.115C>G    | p.Leu39Val        | missense     | rs121912432  | 0                 | 0        | 0           | P              | M   | 58.8 | AD | -     | Death  | 31.5     |
| 6   | 1164    | ALS1 | SOD1  | chr21:33036145       | NM_000454.4 | 2     | c.115C>G    | p.Leu39Val        | missense     | rs121912432  | 0                 | 0        | 0           | P              | F   | 39.7 | AD | 70    | Death  | 24.8     |
| 7   | 1967    | ALS1 | SOD1  | chr21:33036145       | NM_000454.4 | 2     | c.115C>G    | p.Leu39Val        | missense     | rs121912432  | 0                 | 0        | 0           | P              | M   | 51.5 | AD | 72    | Death  | 13.6     |
| 8   | 1285    | ALS1 | SOD1  | chr21:33036146       | NM_000454.4 | 2     | c.116T>G    | p.Leu39Arg        | missense     | -            | 0                 | -        | -           | P              | M   | 32.4 | AD | 99    | Death  | 24.3     |
| 9   | 1405    | ALS1 | SOD1  | chr21:33036155       | NM_000454.4 | 2     | c.125G>A    | p.Gly42Asp        | missense     | rs121912434  | 0                 | 0        | 0           | P              | M   | 59.0 | No | 92    | Death  | 18.2     |
| 10  | 912     | ALS1 | SOD1  | chr21:33036161       | NM_000454.4 | 2     | c.131A>G    | p.His44Arg        | missense     | rs121912435  | 0                 | 0        | 0           | P              | F   | 47.5 | AD | 93    | Death  | 9.2      |
| 11  | 3377    | ALS1 | SOD1  | chr21:33036170       | NM_000454.4 | 2     | c.140A>G    | p.His47Arg        | missense     | rs121912443  | 0                 | 0        | 0           | P              | M   | 55.1 | No | -     | Alive  | 23.8     |
| 12  | 2852    | ALS1 | SOD1  | chr21:33036170       | NM_000454.4 | 2     | c.140A>G    | p.His47Arg        | missense     | rs121912443  | 0                 | 0        | 0           | P              | F   | 43.3 | AD | 97    | Alive  | 50.1     |
| 13  | 3618    | ALS1 | SOD1  | chr21:33036170       | NM_000454.4 | 2     | c.140A>G    | p.His47Arg        | missense     | rs121912443  | 0                 | 0        | 0           | P              | M   | 34.1 | AD | 91    | Alive  | 105.5    |
| 14  | 426     | ALS1 | SOD1  | chr21:33036173       | NM_000454.4 | 2     | c.143T>C    | p.Val48Ala        | missense     | -            | 0                 | -        | -           | LP             | M   | 63.5 | No | -     | Death  | 5.1      |
| 15  | 467     | ALS1 | SOD1  | chr21:33038765       | NM_000454.4 | 3     | c.173G>A    | p.Cys58Tyr        | missense     | -            | 0                 | -        | -           | LP             | M   | 73.1 | No | -     | Death  | 30.5     |
| 16  | 246     | ALS1 | SOD1  | chr21:33038791       | NM_000454.4 | 3     | c.199C>A    | p.Pro67Thr        | missense     | -            | 0                 | -        | -           | LP             | M   | 37.6 | No | -     | Death  | 58.8     |
| 17  | 949     | ALS1 | SOD1  | chr21:33038791       | NM_000454.4 | 3     | c.199C>T    | p.Pro67Ser        | missense     | rs1356474292 | 0                 | -        | -           | P              | F   | 47.3 | No | 54    | Death  | 14.2     |
| 18  | 2373    | ALS1 | SOD1  | chr21:33038791       | NM_000454.4 | 3     | c.199C>G    | p.Pro67Ala        | missense     | -            | 0                 | -        | -           | P              | F   | 64.6 | No | -     | Loss   | 16.0     |
| 19  | 3228    | ALS1 | SOD1  | chr21:33038791       | NM_000454.4 | 3     | c.199C>G    | p.Pro67Ala        | missense     | -            | 0                 | -        | -           | P              | M   | 41.1 | AD | 81    | Alive  | 46.5     |
| 20  | 3860    | ALS1 | SOD1  | chr21:33038791       | NM_000454.4 | 3     | c.199C>T    | p.Pro67Ser        | missense     | rs1356474292 | 0                 | -        | -           | P              | F   | 39.8 | No | -     | Alive  | 16.0     |
| 21  | 3582    | ALS1 | SOD1  | chr21:33038800       | NM_000454.4 | 3     | c.208A>G    | p.Arg70Gly        | missense     | -            | 0                 | -        | -           | LP             | F   | 57.1 | No | 78    | Alive  | 56.8     |
| 22  | 3116    | ALS1 | SOD1  | chr21:33038809       | NM_000454.4 | 3     | c.217G>A    | p.Gly73Ser        | missense     | rs121912455  | 0                 | 0        | 0           | P              | M   | 32.6 | No | 87    | Death  | 14.5     |
| 23  | 1392    | ALS1 | SOD1  | chr21:33038810       | NM_000454.4 | 3     | c.218G>A    | p.Gly73Asp        | missense     | -            | 0                 | -        | -           | LP             | M   | 44.1 | No | 86    | Death  | 63.9     |
| 24  | 3670    | ALS1 | SOD1  | chr21:33038810       | NM_000454.4 | 3     | c.218G>A    | p.Gly73Asp        | missense     | -            | 0                 | -        | -           | LP             | M   | 50.4 | AD | 78    | Alive  | 8.0      |
| 25  | 2043    | ALS1 | SOD1  | chr21:33039581       | NM_000454.4 | 4     | c.250G>C    | p.Asp84His        | missense     | -            | 0                 | -        | -           | LP             | M   | 57.9 | No | 93    | Death  | 21.5     |
| 26  | 2893    | ALS1 | SOD1  | chr21:33039581       | NM_000454.4 | 4     | c.250G>C    | p.Asp84His        | missense     | -            | 0                 | -        | -           | LP             | F   | 57.3 | No | 84    | Death  | 13.3     |
| 27  | 3218    | ALS1 | SOD1  | chr21:33039586       | NM_000454.4 | 4     | c.255G>C    | p.Ala85Phe        | missense     | -            | 0                 | -        | -           | P              | F   | 43.8 | AD | 75    | Alive  | 26.3     |
| 28  | 692     | ALS1 | SOD1  | chr21:33039591       | NM_000454.4 | 4     | c.260A>T    | p.Asn87Ile        | missense     | -            | 0                 | -        | -           | LP             | F   | 55.2 | No | 84    | Death  | 41.6     |
| 29  | 2374    | ALS1 | SOD1  | chr21:33039599       | NM_000454.4 | 4     | c.268G>A    | p.Ala90Thr        | missense     | -            | 0                 | -        | -           | P              | M   | 61.7 | No | -     | Death  | 43.7     |
| 30  | 2718    | ALS1 | SOD1  | chr21:33039599       | NM_000454.4 | 4     | c.268G>A    | p.Ala90Thr        | missense     | -            | 0                 | -        | -           | P              | F   | 49.7 | No | -     | Loss   | 10.4     |
| 31  | 3831    | ALS1 | SOD1  | chr21:33039633       | NM_000454.4 | 4     | c.302 A>G   | p.Glu101Gly       | missense     | rs121912439  | 0                 | -        | -           | P              | M   | 35.0 | AD | -     | Alive  | 32.4     |

|    |      |       |               |                |             |    |              |                 |            |              |        |   |   |    |   |      |    |    |       |       |
|----|------|-------|---------------|----------------|-------------|----|--------------|-----------------|------------|--------------|--------|---|---|----|---|------|----|----|-------|-------|
| 32 | 2045 | ALS1  | <i>SOD1</i>   | chr21:33039637 | NM_000454.4 | 4  | c.306T>G     | p.Asp102Glu     | missense   | -            | -      | - | 0 | LP | F | 55.6 | No | 93 | Death | 27.0  |
| 33 | 786  | ALS1  | <i>SOD1</i>   | chr21:33039650 | NM_000454.4 | 4  | c.319C>T     | p.Leu107Phe     | missense   | -            | 0      | - | - | P  | M | 43.0 | No | -  | Death | 27.4  |
| 34 | 425  | ALS1  | <i>SOD1</i>   | chr21:33039666 | NM_000454.4 | 4  | c.335G>A     | p.Cys112Tyr     | missense   | -            | 0      | - | - | P  | M | 26.7 | No | -  | Death | 16.6  |
| 35 | 1488 | ALS1  | <i>SOD1</i>   | chr21:33039666 | NM_000454.4 | 4  | c.335G>A     | p.Cys112Tyr     | missense   | -            | 0      | - | - | P  | M | 38.8 | No | -  | Death | 40.1  |
| 36 | 1756 | ALS1  | <i>SOD1</i>   | chr21:33039672 | NM_000454.4 | 4  | c.341T>C     | p.Ile114Thr     | missense   | rs121912441  | 0      | 0 | 0 | P  | F | 54.4 | No | -  | Death | 34.0  |
| 37 | 1697 | ALS1  | <i>SOD1</i>   | chr21:33040784 | NM_000454.4 | 5  | c.358G>T     | p.Val120Phe     | missense   | -            | 0      | - | - | LP | M | 32.1 | No | 80 | Death | 30.9  |
| 38 | 2431 | ALS1  | <i>SOD1</i>   | chr21:33040789 | NM_000454.4 | 5  | c.363T>G     | p.His121Gln     | missense   | -            | 0      | - | - | P  | M | 49.8 | No | 67 | Death | 26.2  |
| 39 | 3534 | ALS1  | <i>SOD1</i>   | chr21:33040809 | NM_000454.4 | 5  | c.383G>T     | p.Gly128Val     | missense   | -            | 0      | - | - | P  | M | 32.7 | No | 97 | Death | 10.4  |
| 40 | 3416 | ALS1  | <i>SOD1</i>   | chr21:33040815 | NM_000454.4 | 5  | c.389_390del | p.Gly131Lysfs*2 | frameshift | -            | 0      | - | - | P  | F | 21.4 | AD | 94 | Alive | 23.8  |
| 41 | 3186 | ALS1  | <i>SOD1</i>   | chr21:33040830 | NM_000454.4 | 5  | c.404G>A     | p.Ser135Asn     | missense   | rs121912451  | 0      | 0 | 0 | P  | F | 47.8 | No | -  | Death | 5.0   |
| 42 | 505  | ALS1  | <i>SOD1</i>   | chr21:33040869 | NM_000454.4 | 5  | c.443G>A     | p.Gly148Asp     | missense   | -            | 0      | - | - | LP | F | 29.7 | No | -  | Alive | 127.5 |
| 43 | 2691 | ALS1  | <i>SOD1</i>   | chr21:33040881 | NM_000454.4 | 5  | c.455T>G     | p.Ile152Ser     | missense   | -            | 0      | - | - | LP | F | 50.3 | AD | -  | Death | 30.5  |
| 44 | 2980 | ALS6  | <i>FUS</i>    | chr16:31193937 | NM_004960.3 | 3  | c.142T>C     | p.Ser48Pro      | missense   | -            | 0      | - | - | LP | M | 55.0 | No | 53 | Alive | 11.4  |
| 45 | 2863 | ALS6  | <i>FUS</i>    | chr16:31195209 | NM_004960.3 | 4  | c.221G>A     | p.Gly74Glu      | missense   | -            | 0      | - | - | LP | F | 48.3 | No | 75 | Death | 35.8  |
| 46 | 1897 | ALS6  | <i>FUS</i>    | chr16:31196472 | NM_004960.3 | 6  | c.736G>A     | p.Gly246Ser     | missense   | rs1240931401 | 0      | 0 | 0 | LP | M | 60.5 | No | -  | Loss  | 3.3   |
| 47 | 995  | ALS6  | <i>FUS</i>    | chr16:31202283 | NM_004960.3 | 13 | c.1394-1G>C  | -               | splicing   | -            | 0      | - | - | LP | F | 49.4 | No | 92 | Loss  | 3.3   |
| 48 | 1373 | ALS6  | <i>FUS</i>    | chr16:31202373 | NM_004960.3 | 14 | c.1483C>T    | p.Arg495*       | stop-gain  | rs387906627  | 0      | 0 | 0 | P  | F | 25.3 | No | -  | Death | 43.1  |
| 49 | 1994 | ALS6  | <i>FUS</i>    | chr16:31202374 | NM_004960.3 | 14 | c.1483C>T    | p.Arg495*       | stop-gain  | rs387906627  | 0      | 0 | 0 | P  | M | 26.9 | No | -  | Alive | 60.3  |
| 50 | 952  | ALS6  | <i>FUS</i>    | chr16:31202375 | NM_004960.3 | 14 | c.1483C>T    | p.Arg495*       | stop-gain  | rs387906627  | 0      | 0 | 0 | P  | M | 26.6 | No | 83 | Death | 5.9   |
| 51 | 117  | ALS6  | <i>FUS</i>    | chr16:31202739 | NM_004960.3 | 15 | c.1561C>T    | p.Arg521Cys     | missense   | rs121909668  | 0      | 0 | 0 | P  | F | 64.3 | No | -  | Death | 30.5  |
| 52 | 2324 | ALS6  | <i>FUS</i>    | chr16:31202739 | NM_004960.3 | 15 | c.1561C>T    | p.Arg521Cys     | missense   | rs121909668  | 0      | 0 | 0 | P  | F | 35.9 | No | 76 | Loss  | 9.7   |
| 53 | 3263 | ALS6  | <i>FUS</i>    | chr16:31202739 | NM_004960.3 | 15 | c.1561C>T    | p.Arg521Cys     | missense   | rs121909668  | 0      | 0 | 0 | P  | F | 27.6 | No | 98 | Alive | 26.1  |
| 54 | 2534 | ALS6  | <i>FUS</i>    | chr16:31202739 | NM_004960.3 | 15 | c.1561C>T    | p.Arg521Cys     | missense   | rs121909668  | 0      | 0 | 0 | P  | F | 43.3 | AD | 74 | Death | 34.1  |
| 55 | 3822 | ALS6  | <i>FUS</i>    | chr16:31202739 | NM_004960.3 | 15 | c.1561C>T    | p.Arg521Cys     | missense   | rs121909668  | 0      | 0 | 0 | P  | M | 31.9 | AD | -  | Alive | 14.1  |
| 56 | 409  | ALS6  | <i>FUS</i>    | chr16:31202740 | NM_004960.3 | 15 | c.1562G>A    | p.Arg521His     | missense   | rs121909671  | 0.0003 | 0 | 0 | P  | F | 43.1 | No | -  | Death | 37.0  |
| 57 | 827  | ALS6  | <i>FUS</i>    | chr16:31202740 | NM_004960.3 | 15 | c.1562G>A    | p.Arg521His     | missense   | rs121909671  | 0.0003 | 0 | 0 | P  | M | 42.8 | No | -  | Death | 61.9  |
| 58 | 1893 | ALS6  | <i>FUS</i>    | chr16:31202740 | NM_004960.3 | 15 | c.1562G>A    | p.Arg521His     | missense   | rs121909671  | 0.0003 | 0 | 0 | P  | F | 45.6 | No | 77 | Death | 22.8  |
| 59 | 2744 | ALS6  | <i>FUS</i>    | chr16:31202740 | NM_004960.3 | 15 | c.1562G>A    | p.Arg521His     | missense   | rs121909671  | 0.0003 | 0 | 0 | P  | F | 45.0 | No | 86 | Death | 42.8  |
| 60 | 3329 | ALS6  | <i>FUS</i>    | chr16:31202740 | NM_004960.3 | 15 | c.1562G>T    | p.Arg521Leu     | missense   | -            | 0      | 0 | 0 | P  | M | 22.5 | AD | 95 | Alive | 19.4  |
| 61 | 3217 | ALS6  | <i>FUS</i>    | chr16:31202740 | NM_004960.3 | 15 | c.1562G>A    | p.Arg521His     | missense   | rs121909671  | 0.0003 | 0 | 0 | P  | F | 32.1 | AD | -  | Alive | 14.4  |
| 62 | 661  | ALS6  | <i>FUS</i>    | chr16:31202752 | NM_004960.3 | 15 | c.1574C>T    | p.Pro525Leu     | missense   | rs886041390  | 0      | 0 | 0 | P  | M | 24.6 | No | -  | Death | 14.2  |
| 63 | 460  | ALS8  | <i>VAPB</i>   | chr20:57019259 | NM_004738.4 | 6  | c.700G>A     | p.Val234Ile     | missense   | rs149215094  | 0      | 0 | 0 | LP | M | 62.1 | No | -  | Death | 5.6   |
| 64 | 3495 | ALS10 | <i>TARDBP</i> | chr1:11080633  | NM_007375.3 | 5  | c.691T>C     | p.Phe231Leu     | missense   | -            | 0      | 0 | 0 | LP | F | 60.4 | AD | -  | Death | 10.7  |
| 65 | 812  | ALS10 | <i>TARDBP</i> | chr1:11082347  | NM_007375.3 | 6  | c.881G>T     | p.Gly294Val     | missense   | rs80356721   | 0      | 0 | 0 | P  | F | 55.0 | No | -  | Death | 42.7  |

|    |      |       |         |                |             |    |                |                  |            |             |   |   |   |    |   |      |    |    |       |      |
|----|------|-------|---------|----------------|-------------|----|----------------|------------------|------------|-------------|---|---|---|----|---|------|----|----|-------|------|
| 66 | 913  | ALS10 | TARDBP  | chr1:11082347  | NM_007375.3 | 6  | c.881G>T       | p.Gly294Val      | missense   | rs80356721  | 0 | 0 | 0 | P  | M | 72.2 | No | 81 | Death | 25.2 |
| 67 | 2411 | ALS10 | TARDBP  | chr1:11082347  | NM_007375.3 | 6  | c.881G>T       | p.Gly294Val      | missense   | rs80356721  | 0 | 0 | 0 | P  | M | 46.3 | No | -  | Death | 22.8 |
| 68 | 2414 | ALS10 | TARDBP  | chr1:11082347  | NM_007375.3 | 6  | c.881G>T       | p.Gly294Val      | missense   | rs80356721  | 0 | 0 | 0 | P  | M | 57.3 | No | 96 | Death | 20.0 |
| 69 | 2755 | ALS10 | TARDBP  | chr1:11082347  | NM_007375.3 | 6  | c.881G>T       | p.Gly294Val      | missense   | rs80356721  | 0 | 0 | 0 | P  | F | 62.4 | No | -  | Death | 17.6 |
| 70 | 2858 | ALS10 | TARDBP  | chr1:11082347  | NM_007375.3 | 6  | c.881G>T       | p.Gly294Val      | missense   | rs80356721  | 0 | 0 | 0 | P  | F | 51.7 | No | -  | Death | 20.9 |
| 71 | 1468 | ALS10 | TARDBP  | chr1:11082593  | NM_007375.3 | 6  | c.1127G>A      | p.Gly376Asp      | missense   | -           | 0 | 0 | 0 | LP | F | 49.4 | No | 80 | Death | 20.2 |
| 72 | 2983 | ALS10 | TARDBP  | chr1:11082598  | NM_007375.3 | 6  | c.1132A>G      | p.Asn378Asp      | missense   | -           | 0 | 0 | 0 | LP | M | 52.6 | No | 78 | Death | 9.3  |
| 73 | 3026 | ALS10 | TARDBP  | chr1:11082598  | NM_007375.3 | 6  | c.1132A>G      | p.Asn378Asp      | missense   | -           | 0 | 0 | 0 | LP | F | 32.9 | AD | -  | Death | 6.7  |
| 74 | 291  | ALS10 | TARDBP  | chr1:11082599  | NM_007375.3 | 6  | c.1133A>G      | p.Asn378Ser      | missense   | -           | - | - | 0 | LP | M | 39.8 | No | -  | Loss  | 79.7 |
| 75 | 2249 | ALS10 | TARDBP  | chr1:11082599  | NM_007375.3 | 6  | c.1133A>G      | p.Asn378Ser      | missense   | -           | - | - | 0 | LP | M | 63   | No | -  | Loss  | 10.1 |
| 76 | 1825 | ALS10 | TARDBP  | chr1:11082613  | NM_007375.3 | 6  | c.1147A>G      | p.Ile383Val      | missense   | rs80356740  | 0 | 0 | 0 | LP | F | 60.2 | No | 50 | Death | 51.8 |
| 77 | 3030 | ALS10 | TARDBP  | chr1:11082613  | NM_007375.3 | 6  | c.1147A>G      | p.Ile383Val      | missense   | rs80356740  | 0 | 0 | 0 | LP | F | 63.2 | No | -  | Death | 9.63 |
| 78 | 3095 | ALS10 | TARDBP  | chr1:11082613  | NM_007375.3 | 6  | c.1147A>G      | p.Ile383Val      | missense   | rs80356740  | 0 | 0 | 0 | LP | M | 52.8 | No | 65 | Death | 14.4 |
| 79 | 757  | ALS12 | OPTN    | chr10:13169854 | NM_021980.4 | 11 | c.1352T>C      | p.Ile451Thr      | missense   | rs772864480 | 0 | 0 | 0 | LP | M | 65.3 | No | -  | Alive | 99.3 |
| 80 | 1804 | ALS12 | OPTN    | chr10:13169854 | NM_021980.4 | 11 | c.1352T>C      | p.Ile451Thr      | missense   | rs772864480 | 0 | 0 | 0 | LP | M | 63.2 | No | -  | Alive | 61.6 |
| 81 | 2148 | ALS12 | OPTN    | chr10:13169899 | NM_021980.4 | 11 | c.1397delC     | p.Ala466Valfs*34 | frameshift | -           | 0 | - | - | LP | F | 41.5 | AD | -  | Death | 20.5 |
| 82 | 2537 | ALS12 | OPTN    | chr10:13174098 | NM_021980.4 | 12 | c.1433A>G      | p.Glu478Gly      | missense   | rs267606929 | 0 | - | - | LP | F | 52.4 | No | -  | Death | 16.2 |
| 83 | 2996 | ALS12 | OPTN    | chr10:13175550 | NM_021980.4 | 13 | c.1583_1584del | p.Ser528*        | Stopgain   | -           | 0 | - | 0 | LP | F | 57.4 | No | -  | Loss  | 11.3 |
| 84 | 3362 | ALS14 | VCP     | chr9:35061164  | NM_007126.4 | 11 | c.1207A>G      | p.Thr403Ala      | missense   | -           | 0 | - | - | LP | M | 64.7 | No | 60 | Death | 9.7  |
| 85 | 3146 | ALS14 | VCP     | chr9:35065361  | NM_007126.4 | 5  | c.463C>T       | p.Arg155Cys      | missense   | rs121909330 | 0 | - | - | P  | F | 49.8 | AD | 90 | Alive | 69.5 |
| 86 | 3339 | ALS14 | VCP     | chr9:35066752  | NM_007126.4 | 4  | c.365C>T       | p.Thr122Ile      | missense   | -           | 0 | - | - | LP | M | 46.4 | AD | 82 | Alive | 58.3 |
| 87 | 3368 | ALS14 | VCP     | chr9:35067922  | NM_007126.4 | 3  | c.268A>G       | p.Asn90Asp       | missense   | -           | 0 | - | - | LP | M | 38.6 | No | 90 | Alive | 49.2 |
| 88 | 1593 | ALS15 | UBQLN2  | X:56591766     | NM_013444.3 | 1  | c.1460C>T      | p.Thr487Ile      | missense   | -           | 0 | - | 0 | LP | M | 38.6 | AD | 78 | Death | 38.0 |
| 89 | 2064 | ALS15 | UBQLN2  | X:56591766     | NM_013444.3 | 1  | c.1460C>T      | p.Thr487Ile      | missense   | -           | 0 | - | 0 | LP | F | 44.4 | No | -  | Death | 37.9 |
| 90 | 3500 | ALS15 | UBQLN2  | X:56591796     | NM_013444.3 | 1  | c.1490C>T      | p.Pro497Leu      | missense   | rs387906709 | 0 | - | - | P  | F | 21.4 | No | 86 | Alive | 20.3 |
| 91 | 750  | ALS15 | UBQLN2  | X:56591822     | NM_013444.3 | 1  | c.1516C>T      | p.Pro506Ser      | missense   | -           | 0 | - | 0 | P  | F | 32.9 | No | -  | Death | 5.1  |
| 92 | 1922 | ALS18 | PFN1    | chr17:4851616  | NM_005022.3 | 1  | c.74A>G        | p.Tyr25Cys       | missense   | -           | 0 | 0 | 0 | LP | M | 81.8 | No | 71 | Alive | 66.0 |
| 93 | 333  | A-F1  | C9orf72 | -              | -           | -  | -              | -                | -          | -           | - | - | - | P  | M | 58.9 | No | -  | Death | 4.3  |
| 94 | 488  | A-F1  | C9orf72 | -              | -           | -  | -              | -                | -          | -           | - | - | - | P  | M | 45.8 | No | -  | Death | 28.2 |
| 95 | 503  | A-F1  | C9orf72 | -              | -           | -  | -              | -                | -          | -           | - | - | - | P  | M | 70.9 | No | -  | Death | 24.9 |
| 96 | 663  | A-F1  | C9orf72 | -              | -           | -  | -              | -                | -          | -           | - | - | - | P  | M | 45.6 | No | -  | Loss  | 4.3  |
| 97 | 850  | A-F1  | C9orf72 | -              | -           | -  | -              | -                | -          | -           | - | - | - | P  | M | 47.6 | No | 75 | Death | 30.9 |
| 98 | 1056 | A-F1  | C9orf72 | -              | -           | -  | -              | -                | -          | -           | - | - | - | P  | M | 47.5 | No | 33 | Death | 24.3 |
| 99 | 1184 | A-F1  | C9orf72 | -              | -           | -  | -              | -                | -          | -           | - | - | - | P  | F | 46.8 | No | 60 | Death | 31.4 |

|     |      |       |                |                |             |    |                |                 |            |             |   |   |   |   |    |   |      |    |    |       |      |
|-----|------|-------|----------------|----------------|-------------|----|----------------|-----------------|------------|-------------|---|---|---|---|----|---|------|----|----|-------|------|
| 100 | 1398 | A-F1  | <i>C9orf72</i> | -              | -           | -  | -              | -               | -          | -           | - | - | - | - | P  | F | 47.3 | No | 66 | Death | 17.2 |
| 101 | 1733 | A-F1  | <i>C9orf72</i> | -              | -           | -  | -              | -               | -          | -           | - | - | - | - | P  | M | 55.4 | No | -  | Death | 48.8 |
| 102 | 1833 | A-F1  | <i>C9orf72</i> | -              | -           | -  | -              | -               | -          | -           | - | - | - | - | P  | F | 50.1 | No | 90 | Death | 37.4 |
| 103 | 2047 | A-F1  | <i>C9orf72</i> | -              | -           | -  | -              | -               | -          | -           | - | - | - | - | P  | M | 54.0 | No | 81 | Death | 21.4 |
| 104 | 2408 | A-F1  | <i>C9orf72</i> | -              | -           | -  | -              | -               | -          | -           | - | - | - | - | P  | F | 60.5 | No | -  | Death | 42.6 |
| 105 | 2856 | A-F1  | <i>C9orf72</i> | -              | -           | -  | -              | -               | -          | -           | - | - | - | - | P  | M | 69.5 | No | -  | Alive | 33.9 |
| 106 | 2987 | A-F1  | <i>C9orf72</i> | -              | -           | -  | -              | -               | -          | -           | - | - | - | - | P  | F | 66.1 | No | 94 | Alive | 29.9 |
| 107 | 3043 | A-F1  | <i>C9orf72</i> | -              | -           | -  | -              | -               | -          | -           | - | - | - | - | P  | M | 59.9 | No | 72 | Alive | 32.7 |
| 108 | 3069 | A-F1  | <i>C9orf72</i> | -              | -           | -  | -              | -               | -          | -           | - | - | - | - | P  | F | 61.8 | No | -  | Death | 17.8 |
| 109 | 3200 | A-F1  | <i>C9orf72</i> | -              | -           | -  | -              | -               | -          | -           | - | - | - | - | P  | M | 62.3 | No | 82 | Alive | 38.9 |
| 110 | 3446 | A-F1  | <i>C9orf72</i> | -              | -           | -  | -              | -               | -          | -           | - | - | - | - | P  | M | 49.1 | No | 85 | Alive | 14.6 |
| 111 | 2817 | A-F1  | <i>C9orf72</i> | -              | -           | -  | -              | -               | -          | -           | - | - | - | - | P  | M | 54.8 | No | 63 | Death | 27.0 |
| 112 | 2499 | A-F1  | <i>C9orf72</i> | -              | -           | -  | -              | -               | -          | -           | - | - | - | - | P  | M | 51.8 | No | -  | Death | 18.9 |
| 113 | 2625 | ALS20 | <i>HNRNPAl</i> | chr12:54677706 | NM_031157.3 | 9  | c.1018C>T      | p.Pro340Ser     | missense   | -           | - | - | - | - | LP | M | 25.5 | No | 98 | Alive | 49.2 |
| 114 | 2336 | A-F2  | <i>CHCHD10</i> | chr22:24108215 | NM_213720.2 | 4  | c.410-2A>G     | -               | splicing   | -           | 0 | - | 0 | - | LP | M | 67.9 | No | -  | Death | 60.9 |
| 115 | 1243 | A-F2  | <i>CHCHD10</i> | chr22:24108418 | NM_213720.2 | -  | c.306G>C       | p.Gln102His     | missense   | -           | - | - | 0 | - | LP | M | 44.1 | No | 86 | Death | 63.5 |
| 116 | 1937 | A-F4  | <i>TBK1</i>    | chr12:64858158 | NM_013254.3 | 4  | c.273T>A       | p.Cys91*        | Stopgain   | -           | 0 | - | - | - | LP | M | 42.3 | No | 80 | Death | 26.9 |
| 117 | 3240 | A-F4  | <i>TBK1</i>    | chr12:64860863 | NM_013254.3 | 15 | c.540+1G>C     | -               | splicing   | -           | 0 | - | - | - | LP | M | 62.0 | No | 60 | Alive | 14.3 |
| 118 | 2564 | A-F4  | <i>TBK1</i>    | chr12:64868152 | NM_013254.3 | 6  | c.683G>A       | p.Arg228His     | missense   | rs748622208 | 0 | 0 | 0 | - | LP | M | 40.9 | No | 90 | Alive | 11.9 |
| 119 | 1658 | A-F4  | <i>TBK1</i>    | chr12:64873890 | NM_013254.3 | 7  | c.800G>A       | p.Cys267Tyr     | missense   | -           | 0 | - | - | - | LP | F | 46.1 | No | -  | Death | 18.8 |
| 120 | 2263 | A-F4  | <i>TBK1</i>    | chr12:64875688 | NM_013254.3 | 8  | c.879G>A       | p.Trp293*       | Stopgain   | -           | 0 | - | - | - | LP | M | 74.9 | No | 74 | Death | 10.1 |
| 121 | 1579 | A-F4  | <i>TBK1</i>    | chr12:64875728 | NM_013254.3 | 8  | c.919C>T       | p.His307Tyr     | missense   | -           | 0 | - | - | - | LP | M | 56.5 | No | 88 | Death | 19.2 |
| 122 | 1631 | A-F4  | <i>TBK1</i>    | chr12:64875728 | NM_013254.3 | 8  | c.919C>T       | p.His307Tyr     | missense   | -           | 0 | - | - | - | LP | M | 67.7 | No | -  | Death | 21.3 |
| 123 | 2572 | A-F4  | <i>TBK1</i>    | chr12:64879233 | NM_013254.3 | 19 | c.1190-2A>T    | -               | splicing   | -           | 0 | - | - | - | LP | F | 20.1 | No | 91 | Alive | 52.2 |
| 124 | 1821 | A-F4  | <i>TBK1</i>    | chr12:64882308 | NM_013254.3 | 12 | c.1382_1385del | p.Thr462Lysfs*3 | frameshift | -           | 0 | - | - | - | P  | M | 45.0 | No | -  | Alive | 86.4 |
| 125 | 2493 | A-F4  | <i>TBK1</i>    | chr12:64889511 | NM_013254.3 | 15 | c.1676T>G      | p.Met559Arg     | missense   | -           | 0 | - | - | - | LP | F | 34.1 | No | 95 | Alive | 45.1 |
| 126 | 2497 | ALS24 | <i>NEK1</i>    | chr4:170315675 | NM_012224.2 | 34 | c.3764-1G>C    | -               | splicing   | -           | 0 | - | - | - | LP | M | 49.8 | No | 93 | Alive | 43.0 |
| 127 | 3242 | ALS24 | <i>NEK1</i>    | chr4:170321671 | NM_012224.2 | 32 | c.3630+1G>T    | -               | splicing   | -           | 0 | - | - | - | LP | F | 68.0 | No | -  | Alive | 33.9 |
| 128 | 1995 | ALS24 | <i>NEK1</i>    | chr4:170322802 | NM_012224.2 | 31 | c.3499+1G>A    | -               | splicing   | -           | 0 | - | - | - | LP | M | 61.8 | No | -  | Death | 20.7 |
| 129 | 3367 | ALS24 | <i>NEK1</i>    | chr4:170354729 | NM_012224.2 | 27 | c.2768G>A      | p.Trp923*       | Stopgain   | -           | 0 | - | - | - | LP | F | 48.0 | No | 82 | Death | 17.7 |
| 130 | 465  | ALS24 | <i>NEK1</i>    | chr4:170384477 | NM_012224.2 | 25 | c.2420C>T      | p.Pro807Leu     | missense   | rs368699255 | 0 | 0 | 0 | - | LP | F | 53.0 | No | -  | Death | 60.5 |
| 131 | 682  | ALS24 | <i>NEK1</i>    | chr4:170384477 | NM_012224.2 | 25 | c.2420C>T      | p.Pro807Leu     | missense   | rs368699255 | 0 | 0 | 0 | - | LP | M | 62.1 | No | -  | Death | 40.6 |
| 132 | 1567 | ALS24 | <i>NEK1</i>    | chr4:170384477 | NM_012224.2 | 25 | c.2420C>T      | p.Pro807Leu     | missense   | rs368699255 | 0 | 0 | 0 | - | LP | M | 47.7 | No | 83 | Loss  | 6.3  |
| 133 | 2107 | ALS24 | <i>NEK1</i>    | chr4:170428268 | NM_012224.2 | 21 | c.1843C>T      | p.Arg615Cys     | missense   | -           | 0 | - | 0 | - | LP | M | 67.8 | No | 91 | Alive | 69.5 |

|     |      |       |        |                |              |    |                |                  |            |             |        |        |   |                |   |      |    |    |       |       |
|-----|------|-------|--------|----------------|--------------|----|----------------|------------------|------------|-------------|--------|--------|---|----------------|---|------|----|----|-------|-------|
| 134 | 2438 | ALS24 | NEK1   | chr4:170429929 | NM_001199398 | 19 | c.1607_1608del | p.Lys536Argfs*18 | frameshift | -           | 0      | -      | - | LP             | F | 78.5 | No | -  | Alive | 61.4  |
| 135 | 2383 | ALS24 | NEK1   | chr4:170482706 | NM_012224.2  | 15 | c.1192-1G>T    | -                | splicing   | -           | 0      | -      | - | LP             | F | 48.1 | No | 67 | Death | 23.8  |
| 136 | 3202 | ALS24 | NEK1   | chr4:170498223 | NM_012224.2  | 11 | c.876delA      | p.Arg292Serfs*28 | frameshift | -           | 0      | -      | - | LP             | F | 72.8 | No | -  | Alive | 18.9  |
| 137 | 1525 | ALS24 | NEK1   | chr4:170506597 | NM_012224.2  | 9  | c.710delA      | p.Gln237Argfs*22 | frameshift | -           | 0      | -      | - | LP             | M | 54.4 | No | 65 | Loss  | 42.3  |
| 138 | 876  | ALS24 | NEK1   | chr4:170506666 | NM_012224.2  | 9  | c.641A>G       | p.Lys214Arg      | missense   | -           | 0.0003 | 5.8E-5 | - | LP             | M | 41.9 | No | 90 | Death | 37.6  |
| 139 | 1415 | ALS24 | NEK1   | chr4:170506666 | NM_012224.2  | 9  | c.641A>G       | p.Lys214Arg      | missense   | -           | 0.0003 | 5.8E-5 | - | LP             | M | 61.0 | No | 89 | Death | 68.0  |
| 140 | 1558 | ALS24 | NEK1   | chr4:170506666 | NM_012224.2  | 9  | c.641A>G       | p.Lys214Arg      | missense   | -           | 0.0003 | 5.8E-5 | - | LP             | F | 46.1 | No | 84 | Death | 31.9  |
| 141 | 1864 | ALS24 | NEK1   | chr4:170506666 | NM_012224.2  | 9  | c.641A>G       | p.Lys214Arg      | missense   | -           | 0.003  | 5.8E-5 | - | LP             | F | 48.9 | No | -  | Death | 70.0  |
| 142 | 2425 | ALS24 | NEK1   | chr4:170523180 | NM_012224.2  | 3  | c.193C>T       | p.Gln65*         | Stopgain   | -           | 0      | -      | - | LP             | M | 67.1 | No | -  | Death | 30.9  |
| 143 | 2599 | ALS23 | ANXA11 | chr10:81923147 | NM_001157.2  | 10 | c.1044A>C      | p.Glu348Asp      | missense   | rs756614787 | 0      | 0      | 0 | LP             | F | 75.4 | No | -  | Death | 40.7  |
| 144 | 3048 | ALS23 | ANXA11 | chr10:81923147 | NM_001157.2  | 10 | c.1044A>C      | p.Glu348Asp      | missense   | rs756614787 | 0      | 0      | 0 | LP             | M | 49.5 | No | 86 | Alive | 31.5  |
| 145 | 3223 | ALS23 | ANXA11 | chr10:81929004 | NM_001157.2  | 4  | c.282delC      | p.Ser95Leufs*56  | frameshift | rs777070421 | 0      | 0      | 0 | LP             | M | 42.2 | No | 59 | Alive | 46.5  |
| 146 | 939  | ALS23 | ANXA11 | chr10:81930590 | NM_001157.2  | 3  | c.137C>T       | p.Ala46Val       | missense   | rs762084152 | 0      | 0      | 0 | LP             | F | 61.1 | No | -  | Death | 157.3 |
| 147 | 345  | ALS23 | ANXA11 | chr10:81930608 | NM_001157.2  | 3  | c.119A>G       | p.Asp40Gly       | missense   | -           | 0      | -      | 0 | LP             | F | 62.2 | No | -  | Death | 90.9  |
| 148 | 811  | ALS23 | ANXA11 | chr10:81930608 | NM_001157.2  | 3  | c.119A>G       | p.Asp40Gly       | missense   | -           | 0      | -      | 0 | LP             | M | 66.4 | No | -  | Loss  | 10.0  |
| 149 | 2320 | ALS23 | ANXA11 | chr10:81930608 | NM_001157.2  | 3  | c.119A>G       | p.Asp40Gly       | missense   | -           | 0      | -      | 0 | LP             | F | 59.1 | No | -  | Death | 51.6  |
| 150 | 2733 | ALS25 | KIF5A  | chr12:57963461 | NM_004984.3  | 11 | c.1112G>T      | p.Arg371Leu      | missense   | -           | 0      | -      | - | LP             | M | 55.6 | No | -  | Death | 68.4  |
| 151 | 383  | ALS25 | KIF5A  | chr12:57965871 | NM_004984.3  | 14 | c.1390G>C      | p.Glu464Gln      | missense   | -           | 0      | -      | - | LP             | M | 53.7 | No | -  | Death | 24.1  |
| 152 | 2722 | ALS25 | KIF5A  | chr12:57976382 | NM_004984.3  | 27 | c.2993-3C>T    | -                | splicing   | -           | 0      | -      | 0 | P <sup>#</sup> | M | 52.5 | AD | 65 | Death | 22.2  |
| 153 | 2114 | -     | DNAJC7 | chr17:40133978 | NM_003315.3  | 12 | c.1279A>T      | p.Lys427*        | Stopgain   | -           | 0      | -      | 0 | LP             | F | 53.6 | No | 76 | Death | 32.9  |
| 154 | 1731 | -     | DNAJC7 | chr17:40135592 | NM_003315.3  | 10 | c.1070_1073del | p.Thr357Argfs*10 | frameshift | -           | 0      | -      | - | LP             | F | 50.8 | No | -  | Death | 29.9  |
| 155 | 1107 | -     | DNAJC7 | chr17:40169363 | NM_003315.3  | 1  | c.72delG       | p.Lys25Argfs*31  | frameshift | -           | 0      | -      | - | LP             | M | 64.6 | AD | 80 | Death | 22.3  |

AAO, Age at onset; ExAC\_EAS, ExAC in east-Asian; GnomAD\_EAS, GnomAD in East-Asian; AD, autosomal dominant inheritance; F, female; M, male; FH, family history; “-” in dbSNPs. ExAC\_EAS or GnomAD\_EAS means this variant was not reported in these database.



**Table S5. Top ten P/LP variants enriched in ALS by allelic Fisher's exact test**

| Allele                      | Initial OR | Initial p-value | Secondary OR <sup>#</sup> | Secondary p-value |
|-----------------------------|------------|-----------------|---------------------------|-------------------|
| <i>C9orf72</i> G4C2 repeats | -(20,0)    | 1.7E-7*         | -(20,0)                   | 5.3E-18*          |
| <i>TARDBP</i> p.Gly294Val   | -(6,0)     | 9.4E-3          | -(6,0)                    | 7.0E-6*           |
| <i>FUS</i> p.Arg521Cys      | -(5,0)     | 0.02            | -(5,0)                    | 4.9E-5*           |
| <i>FUS</i> p.Arg521His      | 5.9(5,1)   | 0.101           | -(5,0)                    | 4.9E-5*           |
| <i>FUS</i> p.Arg495*        | -(3,0)     | 0.097           | -(3,0)                    | 0.0026            |
| <i>SOD1</i> p.His47Arg      | -(3,0)     | 0.097           | -(3,0)                    | 0.0026            |
| <i>SOD1</i> p.Leu39Val      | -(3,0)     | 0.097           | -(3,0)                    | 0.0026            |
| <i>TARDBP</i> p.Ile383Val   | -(3,0)     | 0.097           | -(3,0)                    | 0.0026            |
| <i>ANXA11</i> p.Asp40Gly    | -(3,0)     | 0.097           | -(3,0)                    | 0.0026            |
| <i>NEK1</i> p.Pro807Leu     | -(3,0)     | 0.097           | -(3,0)                    | 0.0026            |

Initial stage, represented the comparison between ALS patients (n=1587) and in-house controls (n=1866); Secondary stage, represented the comparison between ALS patients (n=1587) and a larger controls group, coming from GnomAD\_EAS (n=9977); OR, Odds ratios; Odds ratios and the counts in cases and controls are shown in brackets, \*passed significance. -, infinite. The results displayed are from Fisher's exact test. Multiple testing was set at  $P < 5.3E-4(0.05/95)$ , 95 rare P/LP variants in the GI genes were identified in our study.

**Table S6. phenotype and genotype analysis for ALS causative genes in Chinses ALS cohort**

| Genes          | Frequency<br>fALS/sALS | % relative<br>contribution of<br>mutations | Sex<br>ratio(M/F) | Mean<br>AAO | spinal onset<br>(%) | Initial Spinal<br>phenotype (upper<br>vs lower) | Died/survival/<br>loss of follow<br>up | Mean<br>survival/disease<br>duration* | Progression<br>rate(fast%) | Cognitive<br>function<br>impairment <sup>#</sup> | Frontal behavior<br>impairment <sup>#</sup> |
|----------------|------------------------|--------------------------------------------|-------------------|-------------|---------------------|-------------------------------------------------|----------------------------------------|---------------------------------------|----------------------------|--------------------------------------------------|---------------------------------------------|
| <i>SOD1</i>    | 14/29                  | 2.71                                       | 1.2 (23/20)       | 47.4        | 40(93%)             | L>U (9/31)                                      | 29/12/2                                | 31.3/45.2                             | 0.93(44%)                  | 5/24 (21%)                                       | 6/29(21%)                                   |
| <i>C9orf72</i> | 0/20                   | 1.26                                       | 2.3(14/6)         | 55.5        | 15(79%)             | U>L (8/7)                                       | 13/5/2                                 | 27.4/30.0                             | 1.30(80%)                  | 5/11(45%)                                        | 7/11(64%)                                   |
| <i>FUS</i>     | 4/15                   | 1.20                                       | 0.7(8/11)         | 39.5        | 14(74%)             | U>L (8/6)                                       | 10/6/3                                 | 32.8/24.3                             | 0.87(74%)                  | 3/10(30%)                                        | 3/11(27%)                                   |
| <i>NEK1</i>    | 0/17                   | 1.07                                       | 1.1(9/8)          | 57.5        | 17(100%)            | U>L (15/2)                                      | 10/5/2                                 | 40.2/45.3                             | 0.60(41%)                  | 2/9(22%)                                         | 1/7(14%)                                    |
| <i>TARDBP</i>  | 2/13                   | 0.95                                       | 0.7(6/9)          | 54.0        | 13(87%)             | U>L (10/3)                                      | 14/0/1                                 | 20.9/-                                | 1.72(86%)                  | 2/6(33%)                                         | 3/6(50%)                                    |
| <i>TBKI</i>    | 0/10                   | 0.63                                       | 2.3(7/3)          | 49.0        | 8(80%)              | U>L (5/3)                                       | 5/5/0                                  | 19.3/42.0                             | 0.97(70%)                  | 2/7(29%)                                         | 0/8(0.00%)                                  |
| <i>ANXA11</i>  | 0/7                    | 0.44                                       | 0.8(3/4)          | 59.4        | 5(71%)              | U>L (3/2)                                       | 4/2/1                                  | 85.1/39.0                             | 0.60(29%)                  | 1/2(50%)                                         | 2/3(67%)                                    |
| <i>OPTN</i>    | 1/4                    | 0.32                                       | 0.7(2/3)          | 56.0        | 3(60%)              | U>L (3/0)                                       | 2/2/1                                  | 18.4/80.4                             | 1.16(100%)                 | -                                                | -                                           |
| <i>VCP</i>     | 2/2                    | 0.25                                       | 3(3/1)            | 49.9        | 4(100%)             | L>U (1/3)                                       | 1/3/0                                  | 9.7/59.0                              | 0.78(25%)                  | 1/4(25%)                                         | 2/4(50%)                                    |
| <i>UBQLN2</i>  | 1/3                    | 0.25                                       | 0.3(1/3)          | 34.3        | 3(75%)              | U>L (2/1)                                       | 3/1/0                                  | 27.0/20.3                             | 1.64(75%)                  | 0/2(0%)                                          | 0/2(0%)                                     |
| <i>DNAJC7</i>  | 1/2                    | 0.19                                       | 0.5(1/2)          | 56.3        | 2(67%)              | U>L (2/0)                                       | 3/0/0                                  | 28.4                                  | 1.11(33%)                  | 0/2(0.00%)                                       | 1/2(50%)                                    |
| <i>KIF5A</i>   | 1/2                    | 0.19                                       | M (3/0)           | 53.9        | 2(67%)              | U>L (2/0)                                       | 3/0/0                                  | 38.2                                  | 0.60(33%)                  | 1/1(100%)                                        | 1/1(100%)                                   |
| <i>CHCHD10</i> | 0/2                    | 0.13                                       | 1.0(1/1)          | 56.0        | 2(100%)             | U>L (2/0)                                       | 2/0/0                                  | 62.2                                  | 0.21(0%)                   | -                                                | -                                           |
| <i>VAPB</i>    | 0/1                    | 0.06                                       | M                 | 62.1        | 1                   | L                                               | 1/0/0                                  | 5.6                                   | 3.21                       | -                                                | -                                           |
| <i>PFN1</i>    | 0/1                    | 0.06                                       | M                 | 81.8        | 1                   | U                                               | 0/1/0                                  | 66.0                                  | 0.71                       | 1/1(100%)                                        | 0/1(0.00%)                                  |
| <i>HNRNPA1</i> | 0/1                    | 0.06                                       | F                 | 25.5        | 1                   | U                                               | 0/1/0                                  | 49.2                                  | 0.71                       | 0/1(0.00%)                                       | 0/1(0.00%)                                  |
| Total          | 26/129                 | 9.77                                       | 1.2(83/72)        | 50.4        | 132 (85%)           | U>L (73/59)                                     | 100/43/12                              | 31.9/42.5                             | 1.01(58%)                  | 24/81 (30%)                                      | 28/88(32%)                                  |
| None           | 37/1339                | 86.70                                      | 1.4(804/572)      | 54.2        | 1054(76.6%)         | U>L (703/351)                                   | 842/420/114                            | 36.4/50.3                             | 0.84(61.8%)                | 196/607(32.3%)                                   | 239/712(33.65)                              |

AAO, age at onset; \*Mean survival means the mean survival time of dead patients, disease duration means the mean disease duration of survival patients when analysis;

<sup>#</sup>means the ratio of cognitive function impairment or frontal behavior impairment in patients who were assessed using Addenbrooke's Cognitive Examination-revised (ACER), and Frontal Assessment Battery (FAB) tests; M, male; F, female; U, upper; L, lower.

**Table S7. phenotype and genotype analysis for the GII genes in Chinses ALS cohort**

| Genes         | Frequency<br>fALS/sALS | % relative<br>contribution of<br>mutations | Sex<br>ratio(M/F) | Mean<br>AAO | spinal onset<br>(%) | Initial Spinal<br>phenotype (upper<br>vs lower) | Died/survival/<br>loss of follow<br>up | Mean<br>survival/disease<br>duration* | Progression<br>rate(fast%) | Cognitive<br>function<br>impairment <sup>#</sup> | Frontal<br>behavior<br>impairment <sup>#</sup> |
|---------------|------------------------|--------------------------------------------|-------------------|-------------|---------------------|-------------------------------------------------|----------------------------------------|---------------------------------------|----------------------------|--------------------------------------------------|------------------------------------------------|
| <i>SETX</i>   | 2/17                   | 1.20                                       | 0.7 (8/11)        | 49.9        | 15(79%)             | U>L (9/6)                                       | 10/9/0                                 | 41.2/58.9                             | 0.77(758%)                 | 2/7(29%)                                         | 3/10 (30%)                                     |
| <i>NEFH</i>   | 0/10                   | 0.63                                       | 2.3(7/3)          | 54.9        | 6(60%)              | U>L (4/2)                                       | 9/1/0                                  | 31.7/42.0                             | 1.23 (80%)                 | 1/4 (25%)                                        | 2/4 (50%)                                      |
| <i>DAO</i>    | 0/8                    | 0.50                                       | 1.7 (5/3)         | 58.7        | 6(75%)              | U>L (4/2)                                       | 3/4/1                                  | 47.4/54.0                             | 0.28 (13%)                 | 1/4 (25%)                                        | 2/5 (40%)                                      |
| <i>CCNF</i>   | 0/8                    | 0.50                                       | 0.6 (3/5)         | 57.7        | 5(63%)              | U>L (3/2)                                       | 6/2/0                                  | 24.2/76.1                             | 0.96 (63%)                 | 1/4 (25%)                                        | 2/4 (50%)                                      |
| <i>PRPH</i>   | 0/7                    | 0.44                                       | 0.8 (3/4)         | 60.3        | 3(43%)              | U>L (2/1)                                       | 6/0/1                                  | 30.6/-                                | 0.86 (71%)                 | 1/2 (50%)                                        | 0/3 (0%)                                       |
| <i>GRN</i>    | 0/7                    | 0.44                                       | 6 (6/1)           | 60.2        | 4(57%)              | U>L (4/0)                                       | 6/1/0                                  | 33.9/127.7                            | 0.94 (75%)                 | 0/2 (0.00%)                                      | 1/3 (33%)                                      |
| <i>SQSTM1</i> | 0/5                    | 0.32                                       | 0.7 (2/3)         | 55.7        | 5(100%)             | U>L (3/2)                                       | 3/2/0                                  | 29.4/42.4                             | 0.85 (80%)                 | 2/4 (50%)                                        | 1/4 (25%)                                      |
| <i>FIG4</i>   | 0/5                    | 0.32                                       | 0.2 (1/5)         | 50.3        | 3(60%)              | L>U (1/2)                                       | 2/3/0                                  | 47.9/29.2                             | 0.63 (40%)                 | 1/3 (33%)                                        | 1/3 (33%)                                      |
| <i>ERBB4</i>  | 0/5                    | 0.32                                       | 1.5 (3/2)         | 58.5        | 4(80%)              | U>L (4/0)                                       | 2/3/0                                  | 41.6/20.0                             | 0.68 (40%)                 | 1/2 (50%)                                        | 2/3 (67%)                                      |
| <i>ELP3</i>   | 0/4                    | 0.25                                       | 0.3 (1/3)         | 46.0        | 3(75%)              | U>L (2/1)                                       | 3/1/0                                  | 59.1/125.4                            | 0.37 (50%)                 | 1/2 (50%)                                        | 1/2 (50%)                                      |
| <i>EWSR1</i>  | 0/3                    | 0.19                                       | 0.5 (1/2)         | 60.4        | 3(100%)             | U>L (3/0)                                       | 2/1/0                                  | 29.9/33.9                             | 0.91 (67%)                 | 1/2 (50%)                                        | 1/1(100%)                                      |
| <i>PNPLA6</i> | 0/3                    | 0.19                                       | 0.5(1/2)          | 61.3        | 2(67%)              | U=L (1/1)                                       | 2/1/0                                  | 31.2/34.2                             | 0.83 (100%)                | 2/3 (67%)                                        | 0/3 (0%)                                       |
| <i>GTT8D1</i> | 0/3                    | 0.19                                       | - (3/0)           | 47.9        | 3(100%)             | U>L (2/1)                                       | 2/1/0                                  | 22.9/14.6                             | 0.72 (67%)                 | 0/1(0%)                                          | 0/1(0%)                                        |

AAO, age at onset; \*Mean survival means the mean survival time of dead patients, disease duration means the mean disease duration of survival patients when analysis;

<sup>#</sup>means the ratio of cognitive function impairment or frontal behavior impairment in patients who were assessed using Addenbrooke's Cognitive Examination-revised (ACER), and Frontal Assessment Battery (FAB) tests; M, male; F, female; U, upper; L, lower.

**TableS8. Haplotypes of genetic markers surrounding *SOD1* in patients harboring p.L39V and p.H47R variants**

| SNPs                            | Position(hg19)    | Refer | Frequency of Refer in EAS | Patients with p.L39V |      |      |       | Patients with p.H47R |      |      |       |
|---------------------------------|-------------------|-------|---------------------------|----------------------|------|------|-------|----------------------|------|------|-------|
|                                 |                   |       |                           | 728                  | 1164 | 1967 | Share | 3618                 | 2852 | 3377 | share |
| rs2070417                       | 21:32638549       | C     | 0.57                      | AC                   | CC   | AA   | -     | CC                   | AC   | AA   | -     |
| rs845967                        | 21:32688912       | T     | 0.97                      | TT                   | TT   | TT   | T     | TT                   | TT   | TT   | -     |
| rs2284510                       | 21: 32780744      | C     | 0.91                      | TC                   | TC   | CC   | C     | CC                   | CC   | CC   | -     |
| rs13052373                      | 21:32844980       | A     | 0.83                      | AA                   | AA   | AG   | A     | AG                   | AA   | AA   | -     |
| rs9981279                       | 21: 32903888      | A     | 0.86                      | AA                   | AA   | AA   | A     | AA                   | AC   | AA   | -     |
| rs999106                        | 21:32968981       | C     | 0.58                      | CC                   | CC   | AC   | C     | AA                   | CC   | AC   | -     |
| rs4465856                       | 21: 32981750      | C     | 0.60                      | CC                   | CC   | TC   | C     | TT                   | CC   | TC   | -     |
| rs4817415                       | 21: 32991661      | A     | 0.07                      | CC                   | CC   | CC   | C     | CC                   | AC   | CC   | C     |
| rs148022104                     | 21:33007841       | C     | 0.97                      | CC                   | CC   | CC   | C     | TC                   | CC   | CC   | C     |
| <b>rs121912443</b>              | 21:33036170(H47R) | A     | -                         | AA                   | AA   | AA   | A     | AG                   | AG   | AG   | G     |
| <b>rs567511139</b>              | 21: 33040871      | G     | 1.00                      | GG                   | GG   | GG   | G     | GG                   | GG   | GG   | G     |
| rs2833485                       | 21: 33078925      | G     | 0.53                      | AA                   | AG   | AA   | A     | AG                   | AG   | AG   | G     |
| rs7283466                       | 21: 33193131      | G     | 0.78                      | AA                   | AG   | AA   | A     | GG                   | GG   | GG   | G     |
| rs9305473                       | 21: 33233766      | A     | 0.23                      | GG                   | AG   | GG   | G     | AG                   | GG   | GG   | G     |
| rs75329558                      | 21: 33254740      | G     | 0.99                      | GG                   | GG   | GG   | G     | GG                   | GG   | GG   | G     |
| rs2833556                       | 21: 33285300      | G     | 0.73                      | AG                   | GG   | AA   | -     | GG                   | GG   | AG   | G     |
| rs3819152                       | 21: 33331458      | A     | 0.81                      | AG                   | AA   | AG   | -     | AA                   | AA   | AG   | A     |
| rs7280610                       | 21: 33351149      | A     | 0.69                      | AA                   | AA   | GG   | -     | AA                   | AG   | AA   | A     |
| rs8134939                       | 21: 33409932      | C     | 0.67                      | TC                   | CC   | CC   | -     | TC                   | TC   | TC   | C     |
| rs2833640                       | 21: 33450081      | G     | 0.34                      | AA                   | AG   | AA   | -     | AA                   | GG   | AA   | -     |
| The length of sharing haplotype |                   |       |                           | 646.7kb              |      |      |       | 468.3kb              |      |      |       |

The SNPs marked bold indicates this SNP located on *SOD1*; EAS, ExAC in east-Asian

**Table S9. Haplotypes of genetic markers surrounding *FUS* in patients harboring p.R521C and p.R521H variants**

| SNPs                             | Position(hg19)       | Refer | Frequency of Refer in EAS | Patients with p.R521C |      |      |       | Patients with p.R521H |      |       |
|----------------------------------|----------------------|-------|---------------------------|-----------------------|------|------|-------|-----------------------|------|-------|
|                                  |                      |       |                           | 3263                  | 2534 | 2324 | Share | 2744                  | 3217 | share |
| rs12446288                       | 16:30388709          | A     | 0.08                      | -                     | -    | -    | -     | GG                    | AA   | -     |
| rs142100728                      | 16:30390417          | T     | 1.00                      | -                     | -    | -    | -     | TT                    | TT   | T     |
| rs1064524                        | 16:30492823          | C     | 1.00                      | -                     | -    | -    | -     | CC                    | CC   | C     |
| rs61997235                       | 16:30673889          | C     | 1.00                      | -                     | -    | -    | -     | AC                    | CC   | C     |
| rs104894518                      | 16:30997933          | G     | 1.00                      | GG                    | GG   | GG   | -     | AG                    | GG   | G     |
| rs11150606                       | 16:31099011          | T     | 0.20                      | CC                    | CC   | TT   | -     | TC                    | CC   | C     |
| rs7294                           | 16:31102321          | G     | 0.90                      | GG                    | GG   | AG   | G     | GG                    | GG   | G     |
| rs2884737                        | 16: 31105554         | A     | 1.00                      | AA                    | AA   | AA   | A     | AA                    | AA   | A     |
| rs9925964                        | 16: 31129895         | A     | 0.10                      | GG                    | GG   | AG   | G     | GG                    | GG   | G     |
| rs377306867                      | 16: 31160548         | G     | 1.00                      | GG                    | GG   | GG   | G     | GG                    | GG   | G     |
| <b>rs267606831</b>               | 16: 31202410         | G     | -                         | GG                    | GG   | GG   | G     | GG                    | GG   | G     |
| <b><i>FUS</i>p.R521C/p.R521H</b> | 16:31202739/31202740 | C/G   |                           | CT                    | CT   | CT   | T     | AG                    | AG   | A     |
| rs377300213                      | 16: 31226253         | T     | 1.00                      | TT                    | TT   | TT   | T     | TT                    | TT   | T     |
| rs3815801                        | 16: 31276937         | G     | 0.30                      | AA                    | GG   | AG   | -     | AA                    | AA   | A     |
| rs9937837                        | 16: 31298939         | T     | 0.99                      | TT                    | TT   | TG   | -     | TT                    | TT   | T     |
| rs11860650                       | 16: 31326706         | C     | 0.99                      | CC                    | CC   | TC   | -     | CC                    | CC   | C     |
| rs3925075                        | 16: 31347748         | T     | 0.33                      | CC                    | TT   | TT   | -     | CC                    | CC   | C     |
| rs60339402                       | 16: 31383522         | G     | 0.78                      | GG                    | GG   | GG   | -     | AG                    | AG   | G     |
| rs2070896                        | 16: 31384554         | T     | 0.33                      | TC                    | CC   | CC   | -     | TT                    | CC   | -     |
| The length of sharing haplotype  |                      |       |                           | 177.9kb               |      |      |       | 995.7kb               |      |       |

The SNPs marked bold indicates this SNP located on *FUS*; EAS, ExAC in east-Asia

**Table S10. Haplotypes of genetic markers surrounding *TARDBP* in patients harboring p.G294V and p.N378D variants**

| SNPs                            | Position(hg19) | Refer | Frequency of Refer in EAS | Patients with p.G294V |      |      |      |     |          | Patients with p.N378D |      |          |
|---------------------------------|----------------|-------|---------------------------|-----------------------|------|------|------|-----|----------|-----------------------|------|----------|
|                                 |                |       |                           | 2755                  | 2858 | 2411 | 2414 | 913 | share    | 2983                  | 3026 | share    |
| rs12085319                      | 1:11029478     | G     | 0.54                      | TG                    | TG   | TG   | TT   | TT  | -        | TT                    | GG   | -        |
| rs56102775                      | 1:11029942     | G     | 0.71                      | GG                    | GG   | GG   | AG   | AG  | -        | AG                    | GG   | <b>G</b> |
| rs11121667                      | 1:11038476     | C     | 0.70                      | TT                    | TC   | TT   | CC   | TC  | -        | TC                    | TC   | <b>C</b> |
| rs11121670                      | 1:11042242     | C     | 0.99                      | CC                    | CC   | CC   | CC   | CC  | <b>C</b> | CC                    | CC   | <b>C</b> |
| rs7547006                       | 1:11050459     | A     | 0.58                      | AC                    | AA   | AC   | AA   | AA  | <b>A</b> | AC                    | CC   | <b>C</b> |
| rs79373286                      | 1:11060698     | A     | 0.89                      | --                    | AA   | AG   | AA   | AA  | <b>A</b> | AA                    | AG   | <b>A</b> |
| <b>rs80356717</b>               | 1:11078893     | A     | 1.00                      | AA                    | AA   | AA   | AA   | AA  | <b>A</b> | AA                    | AA   | <b>A</b> |
| <b>rs80356719</b>               | 1:11082325     | G     | 1.00                      | GG                    | GG   | GG   | GG   | GG  | <b>G</b> | GG                    | GG   | <b>G</b> |
| <b><i>TARDBP</i> p.G294V</b>    | 1:11082347     | G     | 1.00                      | GT                    | GT   | GT   | GT   | GT  | <b>T</b> | GG                    | GG   | <b>G</b> |
| rs2273346                       | 1:11090897     | A     | 0.78                      | --                    | AG   | AA   | AA   | AG  | <b>A</b> | AA                    | AG   | <b>A</b> |
| rs2273342                       | 1:11116052     | C     | 0.96                      | TC                    | CC   | CC   | CC   | CC  | <b>C</b> | CC                    | CC   | <b>C</b> |
| rs12140947                      | 1:11179170     | G     | 0.91                      | GG                    | GG   | GG   | GG   | GG  | <b>G</b> | GG                    | AG   | <b>G</b> |
| rs17036414                      | 1:11211395     | G     | 0.91                      | GG                    | GG   | GG   | GG   | GG  | <b>G</b> | GG                    | AG   | <b>G</b> |
| rs3765903                       | 1:11260457     | A     | 0.86                      | AA                    | AA   | AA   | AA   | AA  | <b>A</b> | AA                    | AG   | <b>A</b> |
| rs7525957                       | 1:11318236     | C     | 0.12                      | TT                    | TT   | TT   | TT   | TT  | <b>T</b> | TT                    | TT   | <b>T</b> |
| rs2788538                       | 1:11359751     | C     | 0.87                      | CC                    | CC   | CC   | CC   | CC  | <b>C</b> | CC                    | TC   | <b>C</b> |
| rs2744827                       | 1:11389233     | C     | 0.98                      | CC                    | CC   | CC   | CC   | CC  | <b>C</b> | CC                    | CC   | <b>C</b> |
| rs2982380                       | 1:11395283     | A     | 0.90                      | AC                    | AA   | AA   | AA   | AA  | <b>A</b> | CC                    | AA   | -        |
| rs2744854                       | 1:11419868     | C     | 0.22                      | TT                    | TC   | TC   | TT   | TT  | <b>T</b> | CC                    | TT   | -        |
| rs2335404                       | 1:11435942     | T     | 0.67                      | TT                    | TC   | CC   | TT   | TT  | -        | CC                    | CC   | -        |
| The length of sharing haplotype |                |       |                           | 397.5kb               |      |      |      |     |          | 265.8kb               |      |          |

The SNPs marked bold indicates this SNP located on *TARDBP*; EAS, ExAC in east-Asia

**Table S11. Haplotypes of genetic markers surrounding *NEK1* in patients harboring p.K214R and p.P807L variants**

| SNPs                            | Position(hg19) | Refer | Frequency of Refer in EAS | Patients with p.K214R |      |      |       | Patients with p.P807L |     |     |       |
|---------------------------------|----------------|-------|---------------------------|-----------------------|------|------|-------|-----------------------|-----|-----|-------|
|                                 |                |       |                           | 876                   | 1558 | 1864 | Share | 1567                  | 682 | 465 | share |
| rs10021579                      | 4:169680887    | A     | 0.39                      | AA                    | AC   | CC   | -     | -                     | -   | -   | -     |
| rs142483450                     | 4:169682157    | T     | 0.98                      | TT                    | TC   | TT   | T     | -                     | -   | -   | -     |
| rs1318822                       | 4:169764489    | G     | 0.78                      | GG                    | AG   | GG   | G     | GG                    | AG  | AA  | -     |
| rs4396955                       | 4:169845720    | C     | 0.93                      | CC                    | TC   | CC   | C     | CC                    | CC  | CC  | -     |
| rs17658335                      | 4:169998230    | G     | 0.34                      | AG                    | AG   | AG   | G     | AG                    | AG  | AA  | -     |
| rs1471172                       | 4:170017860    | G     | 0.35                      | AG                    | AG   | AA   | A     | AA                    | AA  | AG  | -     |
| rs2706713                       | 4:170089950    | A     | 0.30                      | GG                    | GG   | GG   | G     | GG                    | GG  | AA  | -     |
| rs75744327                      | 4:170140331    | C     | 0.95                      | CC                    | CC   | CC   | C     | CC                    | AC  | CC  | C     |
| rs7671546                       | 4:170262104    | A     | 0.10                      | AG                    | GG   | GG   | G     | GG                    | GG  | GG  | G     |
| <b>rs368699255</b>              | 4:170384477    | G     | 1.00                      | GG                    | GG   | GG   | G     | AG                    | AG  | AG  | G     |
| <b>rs200161705</b>              | 4:170506525    | C     | 1.00                      | CC                    | CC   | CC   | C     | CC                    | CC  | CC  | C     |
| <b>rs11132810</b>               | 4:170534100    | A     | 0.45                      | AC                    | AC   | AC   | A     | AC                    | CC  | AC  | C     |
| rs72696684                      | 4:170660605    | A     | 0.94                      | AA                    | AA   | AA   | A     | AC                    | AA  | AA  | A     |
| rs6810718                       | 4:170778702    | A     | 0.41                      | AC                    | AC   | AC   | A     | AA                    | AC  | AC  | A     |
| rs11132829                      | 4:170814998    | T     | 0.11                      | CC                    | CC   | TC   | C     | TC                    | TC  | CC  | C     |
| rs6842442                       | 4:170933203    | C     | 0.31                      | TC                    | TT   | TC   | T     | TT                    | CC  | TT  | -     |
| rs11734170                      | 4:171271707    | G     | 0.97                      | GG                    | GG   | AG   | G     | GG                    | GG  | GG  | -     |
| rs35270214                      | 4:171620047    | C     | 0.92                      | TC                    | TC   | TC   | C     | -                     | -   | -   | -     |
| rs967616                        | 4:171888222    | C     | 0.10                      | TC                    | TC   | TC   | C     | -                     | -   | -   | -     |
| rs2070371                       | 4:172424391    | A     | 0.30                      | CC                    | AG   | GG   | -     | -                     | -   | -   | -     |
| The length of sharing haplotype |                |       |                           | 2.74Mb                |      |      |       | 843.4kb               |     |     |       |

The SNPs marked bold indicates this SNP located on *NEK1*; EAS, ExAC in east-Asia

**TableS12. Haplotypes of genetic markers surrounding *ANXA11* in patients harboring p.D40G variants**

| SNPs                            | Position(hg19) | Refer | Frequency<br>of Refer in<br>EAS | Patients with p.D40G |     |      |       |
|---------------------------------|----------------|-------|---------------------------------|----------------------|-----|------|-------|
|                                 |                |       |                                 | 345                  | 811 | 2320 | Share |
| rs7904954                       | 10:81758995    | A     | 0.35                            | AG                   | GG  | AA   | -     |
| rs74725507                      | 10:81781304    | T     | 0.98                            | TT                   | TT  | TT   | T     |
| rs10887392                      | 10:81791482    | A     | 0.61                            | AA                   | AG  | AA   | A     |
| rs7083481                       | 10:81884845    | G     | 0.57                            | GG                   | AG  | GG   | G     |
| rs745182                        | 10:81901722    | G     | 0.42                            | AG                   | AG  | AG   | G     |
| <b>rs184560325</b>              | 10:81918018    | G     | 0.99                            | GG                   | GG  | GG   | G     |
| <b>rs772725616</b>              | 10:81926644    | G     | 1.00                            | GG                   | GG  | GG   | G     |
| <b>rs188213562</b>              | 10:81930990    | G     | 0.99                            | GG                   | GG  | GG   | G     |
| <b>rs147286383</b>              | 10:81964868    | G     | 0.98                            | GG                   | GG  | GG   | G     |
| rs12355463                      | 10:82008561    | G     | 0.51                            | AG                   | AG  | AA   | G     |
| rs10887708                      | 10:82027988    | G     | 0.55                            | AG                   | AG  | GG   | G     |
| rs4934027                       | 10:82035560    | C     | 0.55                            | TC                   | TC  | CC   | C     |
| rs11202666                      | 10:82118498    | A     | 0.47                            | AG                   | AG  | GG   | A     |
| rs10466235                      | 10:82149655    | T     | 0.14                            | CC                   | CC  | CC   | C     |
| rs17105023                      | 10:82182339    | A     | 0.90                            | AA                   | AA  | AA   | A     |
| rs116849573                     | 10:82204368    | T     | 0.96                            | TC                   | TT  | TC   | T     |
| rs7080169                       | 10:82232706    | G     | 0.66                            | AG                   | AG  | GG   | G     |
| rs12411484                      | 10:82263954    | A     | 0.71                            | AG                   | GG  | AA   | -     |
| The length of sharing haplotype |                |       |                                 | 504.9kb              |     |      |       |

The SNPs marked bold indicates this SNP located on *ANXA11*; EAS, ExAC in east-Asia



**Table S13. The number of patients with more than one rare variant of GI and GII genes**

| Genes     | Pathogenicity   | GI genes (number) |     |        | GII genes (number) |                 | Total |
|-----------|-----------------|-------------------|-----|--------|--------------------|-----------------|-------|
|           |                 | P/LP              | VUS | Benign | Deleterious        | Non-deleterious |       |
| GI genes  | P/LP            | 0                 | 10  | 1      | 9                  | 11              | 31    |
|           | VUS             | -                 | 1   | 0      | 2                  | 3               | 6     |
|           | Benign          | -                 | -   | 0      | 0                  | 0               | 0     |
| GII genes | Deleterious     | -                 | -   | -      | 7                  | 3               | 10    |
|           | Non-deleterious | -                 | -   | -      | -                  | 3               | 3     |

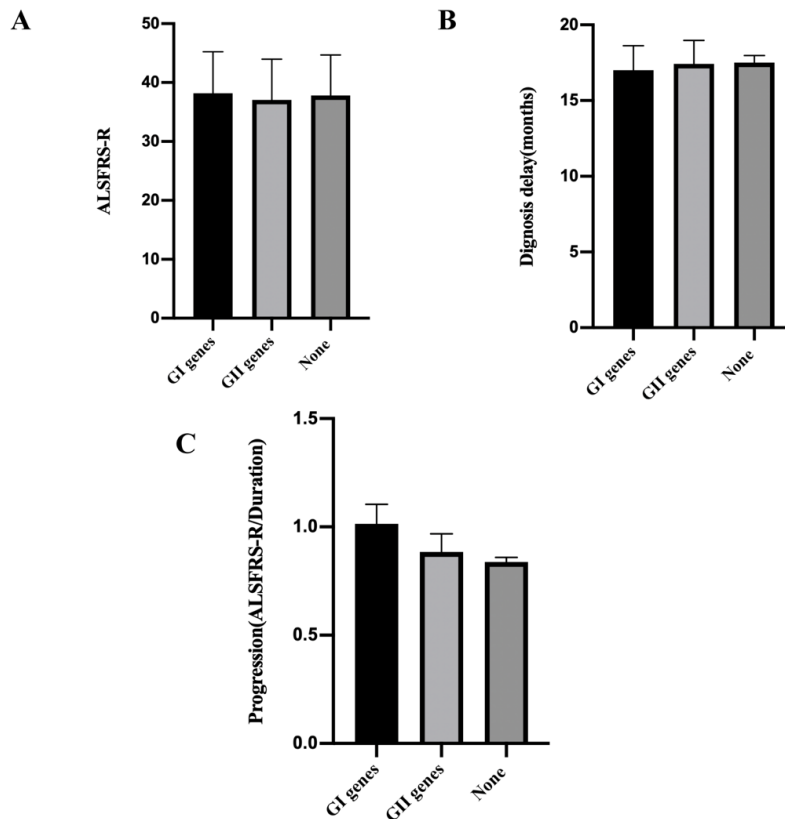

**Figure S1. The comparison of ALSFRS-R, diagnosis delay and disease progression at baseline among patients with rare P/LP variants in the GI genes, rare deleterious variants in the GII genes and without rare damaging variants in the GI and GII genes. A)** The Mean  $\pm$  SD of ALSFRS-R is  $38.2 \pm 7.0$  in patients with rare P/LP variants of the GI genes ( $n=155$ ),  $37.1 \pm 6.9$  in patients with rare deleterious variants of the GII genes ( $n=100$ ) and  $37.8 \pm 6.9$  in patients without rare damaging variants in the GI and GII genes ( $n=1276$ ). No significant differences in ALSFRS-R among patients with or without rare damaging variants of the GI and GII genes. **B)** The Mean  $\pm$  SD of diagnosis delay is  $17.0 \pm 20.0$  months in patients with rare P/LP variants of the GI genes ( $n=155$ ),  $17.4 \pm 15.5$  months in patients with rare deleterious variants of the GII genes ( $n=100$ ) and  $17.5 \pm 16.9$  in patients without rare damaging variants in the GI and GII genes ( $n=1276$ ). No significant differences in diagnosis delay between patients with or without rare damaging variants of the GI and GII genes. **C)** The Mean  $\pm$  SD of progression rate is  $1.0 \pm 1.1$  in patients with rare P/LP variants of the GI genes ( $n=155$ ),  $0.9 \pm 0.8$  in patients with rare deleterious variants of the GII genes ( $n=100$ ),  $0.8 \pm 0.7$  in patients without rare damaging variants in the GI and GII genes ( $n=1276$ ). No significant differences in progression rate between patients with or without rare damaging variants of the GI and GII genes. SD, standard deviation. GI, ALS causative genes; GII, new, needing to be confirmed or risk genes

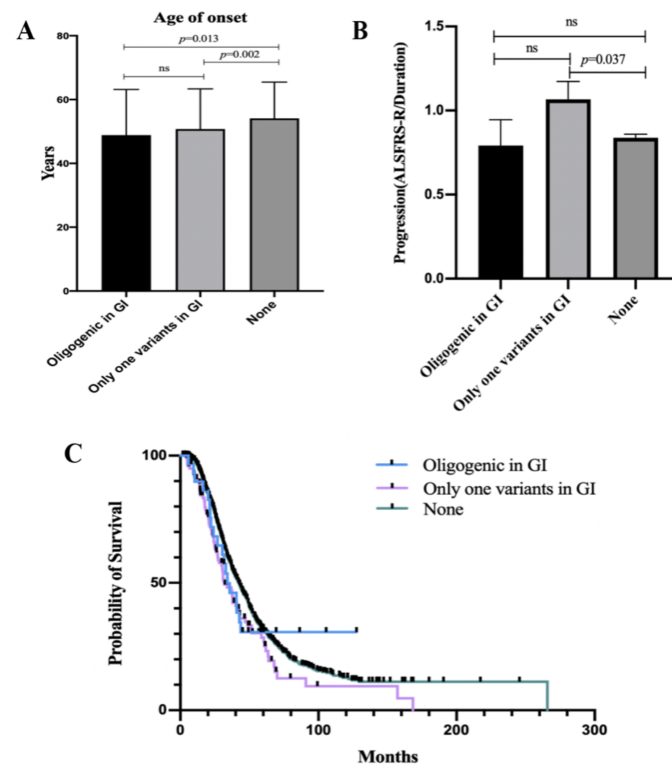

**Figure S2. The comparison of age of onset, disease progression and median survival time among patients with more than one variant in the GI genes (at least one P/LP variants, n=31), only one rare P/LP variants in the GI genes (n=124), and without rare damaging variants in the GI and GII genes (n=1276).** **A)** The Mean  $\pm$  SD of age of onset is  $48.9 \pm 14.3$  years in patients with more than one variant in the GI genes,  $50.8 \pm 12.6$  years in patients with only one rare P/LP variants in the GI genes and  $54.1 \pm 11.4$  years in patients without rare damaging variants in the GI and GII genes. No significant differences in age of onset between patients with more than one variant in the GI genes and with only one rare P/LP variants in the GI genes. **B)** The Mean  $\pm$  SD of progression rate is  $0.8 \pm 0.8$  months in patients with more than one variant in the GI genes,  $1.1 \pm 1.2$  months in patients with only one rare P/LP variants in the GI genes and  $0.8 \pm 0.7$  in patients without rare damaging variants in the GI and GII genes. No significant differences in progression rate between patients with more than one variant in the GI genes and with only one rare P/LP variants in the GI genes. **C)** The median survival time is  $34.1$  (95%CI:23.1-45.2) months in patients with more than one variant in the GI genes,  $31.9$  (95%CI:25.7-38.1) months in patients with only one rare P/LP variants in the GI genes,  $42.6$  (95%CI:39.9-45.3) months in patients without rare damaging variants in the GI and GII genes. The significant difference was found between patients with only one rare P/LP variants in the GI genes and without rare damaging variants in the GI and GII genes ( $p=0.005$ ), but no significant differences in median survival time between patients with more than one variant in the GI genes and with only one rare P/LP variants in the GI genes. SD, standard deviation. GI, ALS causative genes; GII, new, needing to be confirmed or risk gene

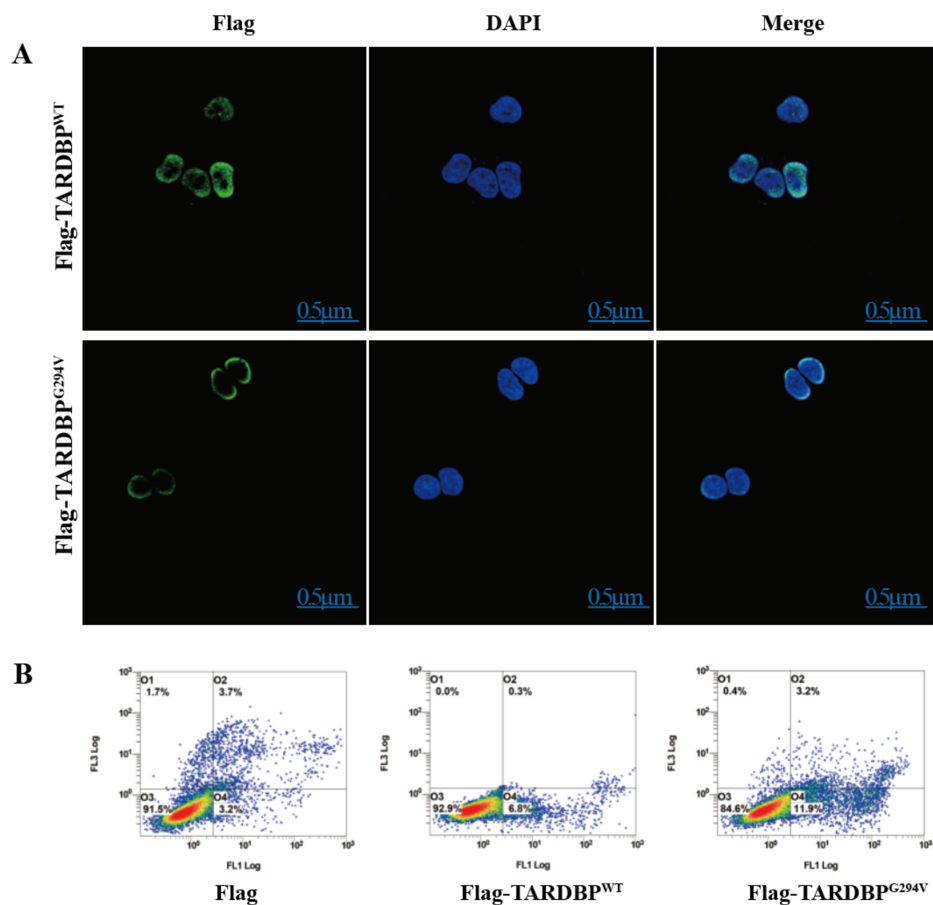

**Figure S3. Functional analysis for p.Gly294Val of *TARDBP*.** **A**) Immunocytochemistry analysis for the distribution of the mutant *TARDBP* (*TARDBP*<sup>G294V</sup>) and wild-type *TARDBP* (*TARDBP*<sup>WT</sup>). Mutant *TARDBP*<sup>G294V</sup> mainly be around the nucleus or within the cytoplasm, but wild-type *TARDBP* diffusely distributed in the nucleus. HEK-293T Cells were transfected plasmids for 48 h, and stained with Flag-antibody (green) and DAPI (blue); **B**) Annexin V staining to measure apoptosis in HEK-293T cells when *TARDBP* mutates or not by flow cytometry. Cells transfected pCMV-MCS -3\*Flag-*TARDBP*<sup>G294V</sup> group showed much more ratio of the apoptosis cells than that in pCMV-MCS -3\*Flag-*TARDBP*<sup>WT</sup> and empty vector groups.
