# Supplementary material for: Role of genetics in amyotrophic lateral sclerosis: a large cohort study in Chinese mainland population
Source: PubMed Central journal article supplement — J Med Genet. 2021 Sep 20;59(9):840–9. doi: 10.1136/jmedgenet-2021-107965 (PMC9411893; doi:10.1136/jmedgenet-2021-107965), 2021-09-20
Supplement: jmedgenet-2021-107965supp002.pdf [file jmedgenet-2021-107965supp002.pdf]

Table S14. Information of rare variants identified in ALS patients.

Table with columns: Patient ID, ALS, Gene, Chromosomal Position (hg19), HGVS (Refseq ID, Exon, cDNA change, Amino Acid change), Het/Hom, Variant Type, dbSNP, Minor allele frequencies (EXAC East Asia, gnomAD East Asia, In-house controls), HGMD, Clinical significance, Functional predictions (SIFT, PPH2, MA, FATHMM, CADD, prediction), novel, ACMG (Evidence, classification). The table lists 273 variants across various genes including TARDBP, OPTN, FUS, and SOD1.
