# Supplementary material for: Role of genetics in amyotrophic lateral sclerosis: a large cohort study in Chinese mainland population
Source: PubMed Central journal article supplement — J Med Genet. 2021 Sep 20;59(9):840–9. doi: 10.1136/jmedgenet-2021-107965 (PMC9411893; doi:10.1136/jmedgenet-2021-107965), 2021-09-20
Supplement: jmedgenet-2021-107965supp003.pdf [file jmedgenet-2021-107965supp003.pdf]

|  |  | HGVS |  |  | Minor allele frequencies |  | Consistent |  |
|--|--|------|--|--|--------------------------|--|------------|--|
|--|--|------|--|--|--------------------------|--|------------|--|

| AGS Human Genome Variation Society, HGMD Human Gene Mutation Database, SNP 1: Sorting intolerant from 10 tolerant, PolyPhen-2: Polymorphism Phenotyping V2, PATHM1: Functional Annotations through Hidden Markov Models, CADD: Combined Annotation Dependent Depletion |       |       |                |           |             |      |                |                      |         |                 |             |                          |             |                |      |                              |       |       |       |       |      |                |              |
|------------------------------------------------------------------------------------------------------------------------------------------------------------------------------------------------------------------------------------------------------------------------|-------|-------|----------------|-----------|-------------|------|----------------|----------------------|---------|-----------------|-------------|--------------------------|-------------|----------------|------|------------------------------|-------|-------|-------|-------|------|----------------|--------------|
| HGVS                                                                                                                                                                                                                                                                   |       |       |                |           |             |      |                |                      |         |                 |             | Minor allele frequencies |             |                |      | Functional predictions       |       |       |       |       |      |                |              |
| Case No.                                                                                                                                                                                                                                                               | ALS   | Gene  | Chromo<br>some | Position  | Refseq ID   | Exon | cDNA<br>change | Amino acid<br>change | Het/Hom | Variant<br>Type | dbSNP       | ExAC<br>East             | ExAC<br>Afr | gnomAD<br>East | HGMD | Clinical<br>significa<br>nce | SIFT  | PPH2  | MA    | FATHM | CADD | predictio<br>n | Damagin<br>g |
| NT20516                                                                                                                                                                                                                                                                |       | CCNF  | chr16          | 2481719   | NM_007612.5 | 5    | c.1766G>A      | p.Val126Met          | het     | missense        |             | -                        | -           | -              | -    | 0.03                         | 0.812 | 0.015 | 1.73  | 24.5  | 4.4  | Y              |              |
| NT198399                                                                                                                                                                                                                                                               |       | CCNF  | chr16          | 2481719   | NM_007612.5 | 5    | c.436G>A       | p.Ala146Thr          | het     | missense        | rs174925359 | 0                        | -           | -              | -    | 0.51                         | 0.001 | 0.955 | 1.89  | 7.5   | 8.5  | N              |              |
| NT210654                                                                                                                                                                                                                                                               |       | CCNF  | chr16          | 2481820   | NM_007612.5 | 6    | c.580T>G       | p.Phe197Cys          | het     | missense        |             | -                        | -           | -              | -    | 0.02                         | 0.975 | 0.214 | 1.76  | 25.7  | 4.6  | Y              |              |
| NT198398                                                                                                                                                                                                                                                               |       | CCNF  | chr16          | 2481830   | NM_007612.5 | 11   | c.1113G>A      | p.His371Gln          | het     | missense        | rs75487774  | 0                        | -           | -              | -    | 0.02                         | 0.975 | 0.214 | 1.76  | 25.7  | 4.6  | Y              |              |
| NT198106                                                                                                                                                                                                                                                               |       | CCNF  | chr16          | 2481961   | NM_007612.5 | 12   | c.1259G>A      | p.Gln419Glu          | het     | missense        | rs75470002  | 0                        | -           | -              | -    | 0.32                         | 0.954 | 0.165 | 1.96  | 27.1  | 5.2  | N              |              |
| TP120473                                                                                                                                                                                                                                                               |       | CCNF  | chr16          | 2484940   | NM_007612.5 | 12   | c.1336G>A      | p.Ala444His          | het     | missense        | rs140549399 | 0                        | -           | -              | -    | 0.69                         | 0.006 | 0.805 | 1.99  | 7.7   | 8.5  | N              |              |
| NT198395                                                                                                                                                                                                                                                               |       | CCNF  | chr16          | 2482935   | NM_007612.5 | 14   | c.1532G>A      | p.His511Gln          | het     | missense        |             | -                        | -           | -              | -    | 0.06                         | 0.975 | 0.214 | 1.76  | 25.7  | 4.6  | Y              |              |
| NT199281                                                                                                                                                                                                                                                               |       | CCNF  | chr16          | 2505226   | NM_007612.5 | 15   | c.1770G>A      | p.Gly590Glu          | het     | missense        |             | -                        | -           | -              | -    | 0.03                         | 0.809 | 0.139 | 1.84  | 21.5  | 2.5  | N              |              |
| NT205351                                                                                                                                                                                                                                                               |       | CCNF  | chr16          | 2506461   | NM_007612.5 | 17   | c.1991G>G      | c.Gln631Gln          | het     | missense        |             | -                        | -           | -              | -    | 0.383                        | 1.19  | 1.62  | 14.3  | 1.6   | N    |                |              |
| NT205352                                                                                                                                                                                                                                                               |       | CCNF  | chr16          | 2506462   | NM_007612.5 | 17   | c.1992G>G      | c.Gln632Gln          | het     | missense        |             | -                        | -           | -              | -    | 0.102                        | 1.02  | 1.59  | 1.62  | 14.3  | 1.6  | N              |              |
| NT198397                                                                                                                                                                                                                                                               |       | CCNF  | chr16          | 2506488   | NM_007612.5 | 17   | c.2198G>A      | p.Arg733Glu          | het     | missense        |             | -                        | -           | -              | -    | 0.74                         | 0.006 | 0.805 | 1.94  | 7.8   | 8.5  | N              |              |
| NT199554                                                                                                                                                                                                                                                               |       | CTD11 | chr16          | 5076363   | NM_015247.2 | 4    | c.24A>C        | p.Gln81His           | het     | missense        |             | -                        | -           | -              | -    | 0.986                        | 0.005 | -0.54 | 21.9  | 4.5   | Y    |                |              |
| TP190146                                                                                                                                                                                                                                                               |       | CTD11 | chr16          | 5076518   | NM_015247.2 | 5    | c.68A>T        | p.Gln231Val          | het     | missense        |             | 5,50E-405                | -           | -              | -    | 0.15                         | 0.998 | 0.915 | -0.44 | 28.1  | 3.6  | Y              |              |
| NT198396                                                                                                                                                                                                                                                               |       | CTD11 | chr16          | 5081184   | NM_015247.2 | 6    | c.1138T>G      | p.Asp378Asn          | het     | missense        |             | -                        | -           | -              | -    | 0.073                        | 0.993 | 0.805 | -0.53 | 28.1  | 3.6  | Y              |              |
| NP213395                                                                                                                                                                                                                                                               |       | CTD11 | chr16          | 5081267   | NM_015247.2 | 10   | c.1196G>A      | p.Arg378His          | het     | missense        | rs70024449  | 0                        | -           | -              | -    | 0.28                         | 0     | 0.495 | -3.7  | 14.8  | 1.6  | N              |              |
| NT198394                                                                                                                                                                                                                                                               |       | CTD11 | chr16          | 5081380   | NM_015247.2 | 10   | c.1367G>A      | p.Gln456Gly          | het     | missense        |             | -                        | -           | -              | -    | 0.06                         | 0.024 | 0.55  | -0.02 | 21.8  | 1.5  | N              |              |
| NT198393                                                                                                                                                                                                                                                               |       | CTD11 | chr16          | 5082714   | NM_015247.2 | 18   | c.2408G>A      | p.Val938Val          | het     | missense        |             | -                        | -           | -              | -    | 0.512                        | 1.75  | -0.03 | 27.8  | 3.6   | Y    |                |              |
| TP190290                                                                                                                                                                                                                                                               |       | GLI3  | chr17          | 5889295   | NM_015247.2 | 7    | c.270T>G       | p.Arg931Gln          | het     | missense        | rs1406151   | 0                        | -           | -              | -    | 0.28                         | 0.006 | 0.805 | 1.96  | 7.8   | 8.5  | N              |              |
| TP190291                                                                                                                                                                                                                                                               |       | GLI3  | chr17          | 5879054   | NM_015247.2 | 8    | c.963C>T       | p.Arg131Ser          | het     | Outpanning      |             | -                        | -           | -              | -    | -                            | -     | -     | -     | -     | -    | 57             | Y            |
| NT219026                                                                                                                                                                                                                                                               |       | GLI3  | chr17          | 5879054   | NM_015247.2 | 8    | c.963C>T       | p.Arg131Ser          | het     | missense        |             | -                        | -           | -              | -    | 0.73                         | 0.969 | 1.385 | 1.06  | 3.2   | 2.2  | Y              |              |
| NT219047                                                                                                                                                                                                                                                               |       | GLI3  | chr17          | 5872946   | NM_015247.2 | 8    | c.780G>T       | p.Arg255Met          | het     | missense        | rs278018099 | 0                        | -           | -              | -    | 0.99                         | 0.996 | 0.996 | 0.99  | 0.99  | 0.99 | 0.99           | Y            |
| NT219391                                                                                                                                                                                                                                                               |       | ITIH4 | chr16          | 70439894  | NM_022713.3 | 13   | c.1119G>A      | p.Val373Ser          | het     | missense        |             | -                        | -           | -              | -    | 0.74                         | 0.007 | 0.895 | 1.88  | 21.3  | 8.5  | N              |              |
| NT198491                                                                                                                                                                                                                                                               |       | ITIH4 | chr16          | 7044351   | NM_022713.2 | 12   | c.1008A>C      | p.Val337Thr          | het     | missense        |             | -                        | -           | -              | -    | 0.001                        | 0.94  | 0.74  | 1.28  | 28.3  | 3.6  | Y              |              |
| NT219445                                                                                                                                                                                                                                                               |       | ITIH4 | chr16          | 7044454   | NM_022713.3 | 12   | c.1188G>A      | p.Val360Met          | het     | missense        |             | -                        | -           | -              | -    | 0.018                        | 0.918 | 0.12  | 1.81  | 27.5  | 2.5  | Y              |              |
| NT203601                                                                                                                                                                                                                                                               |       | ITIH4 | chr16          | 7045412   | NM_022713.3 | 16   | c.692G>A       | p.Arg211His          | het     | missense        |             | -                        | -           | -              | -    | 0.15                         | 0.15  | 1.505 | -2.15 | 25.2  | 0.4  | N              |              |
| NT219053                                                                                                                                                                                                                                                               |       | ITIH4 | chr16          | 7044028   | NM_022713.3 | 6    | c.330T>A       | p.Val113Ile          | het     | missense        |             | -                        | -           | -              | -    | 0.996                        | 1.02  | -2.04 | 25.3  | 4.5   | Y    |                |              |
| NT219323                                                                                                                                                                                                                                                               |       | ITIH4 | chr16          | 7043784   | NM_022713.3 | 1    | c.163G>A       | p.Val56Arg           | het     | missense        |             | -                        | -           | -              | -    | 0.915                        | 0.915 | 0.655 | -0.89 | 25.5  | 4.5  | Y              |              |
| NT219393                                                                                                                                                                                                                                                               | ALS21 | MATR3 | chr17          | 13864335  | NM_199092.5 | 2    | c.211A>G       | p.Val71Cys           | het     | missense        |             | -                        | -           | -              | -    | 0.002                        | 0.054 | 0.73  | 1.31  | 21.9  | 2.5  | N              |              |
| NT2090320                                                                                                                                                                                                                                                              | ALS21 | MATR3 | chr17          | 13864361  | NM_199092.5 | 2    | c.587T>C       | p.Val190Phe          | het     | missense        |             | -                        | -           | -              | -    | 0.003                        | 0.993 | 0.205 | -1.28 | 24.3  | 3.5  | Y              |              |
| NT219378                                                                                                                                                                                                                                                               | ALS21 | MATR3 | chr17          | 13864384  | NM_199092.5 | 2    | c.730C>T       | p.Val244Val          | het     | missense        |             | -                        | -           | -              | -    | 0                            | 0.14  | 0     | -1.07 | 20.7  | 7    | Y              |              |
| NT219382                                                                                                                                                                                                                                                               | ALS21 | MATR3 | chr17          | 138645012 | NM_199092.5 | 2    | c.983A>G       | p.Val328Met          | het     | missense        | rs75007772  | 0                        | -           | -              | -    | 0.09                         | 0.857 | 0.04  | -1.33 | 24.3  | 3.5  | Y              |              |
| NT20916                                                                                                                                                                                                                                                                | ALS21 | MATR3 | chr17          | 138651787 | NM_199092.8 | 3    | c.636G>T       | p.Cys211Tyr          | het     | missense        |             | -                        | -           | -              | -    | 0.09                         | 0.857 | 0.55  | -1.13 | 24.3  | 3.5  | N              |              |

|           |       |        |      |           |             |    |           |             |     |                |           |   |   |       |       |       |       |       |       |    |   |
|-----------|-------|--------|------|-----------|-------------|----|-----------|-------------|-----|----------------|-----------|---|---|-------|-------|-------|-------|-------|-------|----|---|
| NT09375   | AS121 | MAF03  | chr5 | 13661252  | NM_019919.2 | 16 | c.2272A>G | p.Thr758Ala | Int | insufficient   | rs6827486 | 0 | 0 | 0.79  | 0     | 0.345 | -1.02 | 10    | 85    | N  |   |
| NP15084   | AS121 | MAF03  | chr5 | 13661258  | NM_019919.2 | 16 | c.2318A>G | p.Leu773Ser | Int | insufficient   |           | 0 | 0 | 0.17  | 0.023 | 0.345 | -0.99 | 11.3  | 15    | V  |   |
| NP011216  | AS121 | MAF03  | chr5 | 13661357  | NM_019919.2 | 16 | c.2371T>C | A-TA        | Int | Duplicating    |           | 0 | 0 | 0     | 0     | 0     | 0     | 0     | 0     | V  |   |
| NT09380   | AS122 | IT0444 | chr2 | 22011316  | NM_000600.2 | 4  | c.1345G>C | p.Gln415Arg | Int | insufficient   |           | 0 | 0 | 0     | 0.036 | 0.171 | -1    | 22.4  | 45    | V  |   |
| NP049706  | AS122 | IT0444 | chr2 | 22011340  | NM_000600.2 | 4  | c.1019G>A | p.Ser240Asn | Int | insufficient   |           | 0 | 0 | 0.002 | 0.001 | 2.019 | -1.81 | 22.3  | 45    | V  |   |
| NT17080   | AS122 | IT0444 | chr2 | 22011387  | NM_000600.2 | 4  | c.234C>T  | p.Pro175Leu | Int | insufficient   |           | 0 | 0 | 0.001 | 0.983 | 0.107 | -0.31 | 29.3  | 45    | V  |   |
| NP181858  | AS122 | IT0444 | chr2 | 22011434  | NM_000600.2 | 4  | c.2287T>G | p.Arg76Glu  | Int | insufficient   |           | 0 | 0 | 0     | 0.055 | 0.3   | -0.47 | 24.5  | 37    | V  |   |
| NP193931  | AS122 | IT0444 | chr2 | 22011476  | NM_000600.2 | 4  | c.2198C>T | p.Arg61Tyr  | Int | insufficient   |           | 0 | 0 | 0     | 0.618 | 4.285 | -1.61 | 25.6  | 55    | V  |   |
| NP02026   | AS15  | IT0444 | chr2 | 102928628 | NM_001917.4 | 10 | c.4555A>G | p.Gln226Glu | Int | insufficient   |           | 0 | 0 | 0.25  | 0.005 | 0.345 | -1.49 | 14.8  | 85    | N  |   |
| NP215136  | AS15  | IT0444 | chr2 | 102928606 | NM_001917.4 | 10 | c.4913C>T | p.Pro231Ser | Int | insufficient   |           | 0 | 0 | 0     | 0.094 | 0.966 | 1.305 | -0.59 | 24.4  | 45 | V |
| NP150765  | AS15  | IT0444 | chr2 | 102925245 | NM_001917.4 | 10 | c.4806C>T | p.Thr209Ile | Int | insufficient   |           | 0 | 0 | 0     | 0.006 | 0.866 | 1.195 | -1.51 | 21.8  | 45 | V |
| NP110287  | AS15  | IT0444 | chr2 | 102925247 | NM_001917.4 | 10 | c.4806C>T | p.Thr209Ile | Int | insufficient   |           | 0 | 0 | 0     | 0.23  | 0.159 | 1.7   | -1.52 | 14.1  | 35 | N |
| NP198341  | AS15  | IT0444 | chr2 | 102923233 | NM_001917.4 | 10 | c.4893C>G | p.Thr289Ser | Int | insufficient   |           | 0 | 0 | 0     | 0.17  | 0     | 1.185 | -1.4  | 0.403 | 85 | N |
| NP28245   | AS15  | IT0444 | chr2 | 102923021 | NM_001917.4 | 10 | c.4405C>G | p.Val142Ala | Int | insufficient   |           | 0 | 0 | 0     | 0.001 | 0.983 | 1.005 | -1.53 | 24.6  | 45 | V |
| TP110308  | AS15  | IT0444 | chr2 | 102923208 | NM_001917.4 | 10 | c.4806C>G | p.Asn290Glu | Int | insufficient   |           | 0 | 0 | 0     | 0.993 | 3.015 | -1.49 | 26.3  | 45    | V  |   |
| NT149380  | AS15  | IT0444 | chr2 | 102923208 | NM_001917.4 | 10 | c.4806C>G | p.Asn290Glu | Int | insufficient   |           | 0 | 0 | 0     | 0.993 | 3.015 | -1.49 | 26.3  | 45    | V  |   |
| NP154808  | AS15  | IT0444 | chr2 | 102923118 | NM_001917.4 | 10 | c.4875C>A | p.Asn299His | Int | insufficient   |           | 0 | 0 | 0     | 0.982 | 3.915 | -1.51 | 24.9  | 45    | V  |   |
| NP215126  | AS15  | IT0444 | chr2 | 102923226 | NM_001917.4 | 10 | c.4890C>G | p.Asn291His | Int | insufficient   |           | 0 | 0 | 0     | 0.12  | 0.001 | 1.48  | 0.94  | 1.913 | 85 | N |
| NP183922  | AS15  | IT0444 | chr2 | 102926796 | NM_001917.4 | 10 | c.4835C>A | p.Arg262Glu | Int | insufficient   |           | 0 | 0 | 0     | 0.28  | 0.219 | 1.655 | -1.49 | 22.7  | 15 | N |
| NP154596  | AS15  | IT0444 | chr2 | 102926798 | NM_001917.4 | 10 | c.4835C>A | p.Arg262Glu | Int | insufficient   |           | 0 | 0 | 0     | 0.29  | 0.219 | 1.655 | -1.49 | 22.7  | 15 | N |
| NP181496  | AS11  | IT0444 | chr2 | 10083317  | NM_014845.1 | 11 | c.1131T>G | p.Val108Leu | Int | rs.Damianchill |           | 0 | 0 | 0     | 0     | 0     | 0     | 0     | 0     | V  |   |
| NP152861  | AS11  | IT0444 | chr2 | 10083428  | NM_014845.1 | 11 | c.1754G>A | p.Gln152Ser | Int | rs.Damianchill |           | 0 | 0 | 0     | 0     | 0     | 0     | 0     | 0     | V  |   |
| TP110304  | AS11  | IT0444 | chr2 | 10080175  | NM_014845.1 | 11 | c.1001A>G | p.Thr601Ala | Int | insufficient   |           | 0 | 0 | 0     | 0.41  | 0     | -0.32 | 0.77  | 17.7  | 85 | N |
| NP2115412 | AS11  | IT0444 | chr2 | 10112094  | NM_014845.1 | 11 | c.2796C>G | p.Arg766Arg | Int | insufficient   |           | 0 | 0 | 0     | 0.127 | 0.028 | 0.095 | 0.66  | 22.1  | 15 | N |
| NP190519  | AS11  | IT0444 | chr2 | 10104138  | NM_014845.1 | 11 | c.7598C>A | p.Pro455His | Int | insufficient   |           | 0 | 0 | 0     | 0.02  | 0.977 | 0.995 | 0.86  | 23.4  | 55 | V |
| NT19323   | AS11  | IT0444 | chr2 | 10084135  | NM_014845.1 | 11 | c.3835G>T | p.Val295Phe | Int | insufficient   |           | 0 | 0 | 0     | 0     | 0.94  | 1.81  | 0.5   | 26.7  | 45 | V |
| NP18168   | AS11  | IT0444 | chr2 | 10081456  | NM_014845.1 | 11 | c.1141C>T | p.Arg317*   | Int | rs.Damianchill |           | 0 | 0 | 0     | 0     | 0     | 0     | 0     | 0     | V  |   |
| NP08175   | AS11  | IT0444 | chr2 | 10114016  | NM_014845.1 | 11 | c.1160A>A | p.Val709Ser | Int | insufficient   |           | 0 | 0 | 0     | 0.4   | 0.001 | 0.805 | 0.65  | 18.2  | 85 | N |
| NP154441  | AS11  | IT0444 | chr2 | 10081748  | NM_014845.1 | 11 | c.7666C>T | p.Ala409Val | Int | insufficient   |           | 0 | 0 | 0     | 1     | 0.006 | 0.805 | -0.49 | 22.8  | 15 | N |
| NP190212  | AS15  | IT0444 | chr2 | 100817208 | NM_014845.1 | 11 | c.7838C>T | p.Thr412Ser | Int | rs.Damianchill |           | 0 | 0 | 0     | 0     | 0     | 0     | 0     | 0     | V  |   |
| NP190709  | AS17  | IT0444 | chr2 | 57590034  | NM_014041.1 | 11 | c.1311G>T | p.Thr111Ser | Int | insufficient   |           | 0 | 0 | 0     | 0.68  | 0.706 | 0.817 | -0.78 | 22.5  | 17 | N |
| NP181584  | AS17  | IT0444 | chr2 | 57591251  | NM_014041.1 | 11 | c.4271C>G | p.Met114Thr | Int | rs.Damianchill |           | 0 | 0 | 0     | 0.899 | 2.665 | -0.75 | 28.6  | 45    | V  |   |
| NP182860  | AS17  | IT0444 | chr2 | 57591251  | NM_014041.1 | 11 | c.4271C>G | p.Met114Thr | Int | rs.Damianchill |           | 0 | 0 | 0     | 0.983 | 2.71  | -1.51 | 29.1  | 45    | V  |   |
| NP185328  | AS17  | IT0444 | chr2 | 57594864  | NM_020919.1 | 13 | c.4910T>G | p.Arg169Arg | Int | insufficient   |           | 0 | 0 | 0     | 0.986 | 1.5   | 1.55  | 29.1  | 35    | V  |   |
| NP208974  | AS17  | IT0444 | chr2 | 57594864  | NM_020919.1 | 13 | c.4910T>G | p.Arg169Arg | Int | insufficient   |           | 0 | 0 | 0     | 0.986 | 1.5   | 1.55  | 29.1  | 35    | V  |   |
| NP153816  | AS17  | IT0444 | chr2 | 57594864  | NM_020919.1 | 13 | c.4910T>G | p.Arg169Arg | Int | insufficient   |           | 0 | 0 | 0     | 0.986 | 1.5   | 1.55  | 29.1  | 35    | V  |   |
| NP158413  | AS17  | IT0444 | chr2 | 57594864  | NM_020919.1 | 13 | c.4910T>G | p.Arg169Arg | Int | insufficient   |           | 0 | 0 | 0     | 0.986 | 1.5   | 1.55  | 29.1  | 35    | V  |   |
| NT149380  | AS17  | IT0444 | chr2 | 57594864  | NM_020919.1 | 13 | c.4910T>G | p.Arg169Arg | Int | insufficient   |           | 0 | 0 | 0     | 0.986 | 1.5   | 1.55  | 29.1  | 35    | V  |   |
| NP181858  | AS17  | IT0444 | chr2 | 57594864  | NM_020919.1 | 13 | c.4910T>G | p.Arg169Arg | Int | insufficient   |           | 0 | 0 | 0     | 0.986 | 1.5   | 1.55  | 29.1  | 35    | V  |   |
| NP181845  | AS17  | IT0444 | chr2 | 57594864  | NM_020919.1 | 13 | c.4910T>G | p.Arg169Arg | Int | insufficient   |           | 0 | 0 | 0     | 0.986 | 1.5   | 1.55  | 29.1  | 35    | V  |   |
| NT193709  | AS17  | IT0444 | chr2 | 57594867  | NM_020919.1 | 13 | c.4910T>G | p.Arg169Arg | Int | insufficient   |           | 0 | 0 | 0     | 0.986 | 1.5   | 1.55  | 29.1  | 35    | V  |   |
| NP15279   | AS17  | IT0444 | chr2 | 57594869  | NM_020919.1 | 13 | c.4910T>G | p.Arg169Arg | Int | insufficient   |           | 0 | 0 | 0     | 0.986 | 1.5   | 1.55  | 29.1  | 35    | V  |   |
| NP15471   | AS17  | IT0444 | chr2 | 57594870  | NM_020919.1 | 13 | c.4910T>G | p.Arg169Arg | Int | insufficient   |           | 0 | 0 | 0     | 0.986 | 1.5   | 1.55  | 29.1  | 35    | V  |   |
| NP15471   | AS17  | IT0444 | chr2 | 57594870  | NM_020919.1 | 13 | c.4910T>G | p.Arg169Arg | Int | insufficient   |           | 0 | 0 | 0     | 0.986 | 1.5   | 1.55  | 29.1  | 35    | V  |   |
| NP15471   | AS17  | IT0444 | chr2 | 57594870  | NM_020919.1 | 13 | c.4910T>G | p.Arg169Arg | Int | insufficient   |           | 0 | 0 | 0     | 0.986 | 1.5   | 1.55  | 29.1  | 35    | V  |   |
| NP15471   | AS17  | IT0444 | chr2 | 57594870  | NM_020919.1 | 13 | c.4910T>G | p.Arg169Arg | Int | insufficient   |           | 0 | 0 | 0     | 0.986 | 1.5   | 1.55  | 29.1  | 35    | V  |   |
| NP15471   | AS17  | IT0444 | chr2 | 57594870  | NM_020919.1 | 13 | c.4910T>G | p.Arg169Arg | Int | insufficient   |           | 0 | 0 | 0     | 0.986 | 1.5   | 1.55  | 29.1  | 35    | V  |   |
| NP15471   | AS17  | IT0444 | chr2 | 57594870  | NM_020919.1 | 13 | c.4910T>G | p.Arg169Arg | Int | insufficient   |           | 0 | 0 | 0     | 0.986 | 1.5   | 1.55  | 29.1  | 35    | V  |   |
| NP15471   | AS17  | IT0444 | chr2 | 57594870  | NM_020919.1 | 13 | c.4910T>G | p.Arg169Arg | Int | insufficient   |           | 0 | 0 | 0     | 0.986 | 1.5   | 1.55  | 29.1  | 35    | V  |   |
| NP15471   | AS17  | IT0444 | chr2 | 57594870  | NM_020919.1 | 13 | c.4910T>G | p.Arg169Arg | Int | insufficient   |           | 0 | 0 | 0     | 0.986 | 1.5   | 1.55  | 29.1  | 35    | V  |   |
| NP15471   | AS17  | IT0444 | chr2 | 57594870  | NM_020919.1 | 13 | c.4910T>G | p.Arg169Arg | Int | insufficient   |           | 0 | 0 | 0     | 0.986 | 1.5   | 1.55  | 29.1  | 35    | V  |   |
| NP15471   | AS17  | IT0444 | chr2 | 57594870  | NM_020919.1 | 13 | c.4910T>G | p.Arg169Arg | Int | insufficient   |           | 0 | 0 | 0     | 0.986 | 1.5   | 1.55  | 29.1  | 35    | V  |   |
| NP15471   | AS17  | IT0444 | chr2 | 57594870  | NM_020919.1 | 13 | c.4910T>G | p.Arg169Arg | Int | insufficient   |           | 0 | 0 | 0     | 0.986 | 1.5   | 1.55  | 29.1  | 35    | V  |   |
| NP15471   | AS17  | IT0444 | chr2 | 57594870  | NM_020919.1 | 13 | c.4910T>G | p.Arg169Arg | Int | insufficient   |           | 0 | 0 | 0     | 0.986 | 1.5   | 1.55  | 29.1  | 35    | V  |   |
| NP15471   | AS17  | IT0444 | chr2 | 57594870  | NM_020919.1 | 13 | c.4910T>G | p.Arg169Arg | Int | insufficient   |           | 0 | 0 | 0     | 0.986 | 1.5   | 1.55  | 29.1  | 35    | V  |   |
| NP15471   | AS17  | IT0444 | chr2 | 57594870  | NM_020919.1 | 13 | c.4910T>G | p.Arg169Arg | Int | insufficient   |           | 0 | 0 | 0     | 0.986 | 1.5   | 1.55  | 29.1  | 35    | V  |   |
| NP15471   | AS17  | IT0444 | chr2 | 57594870  | NM_020919.1 | 13 | c.4910T>G | p.Arg169Arg | Int | insufficient   |           | 0 | 0 | 0     | 0.986 | 1.5   | 1.55  | 29.1  | 35    | V  |   |
| NP15471   | AS17  | IT0444 | chr2 | 57594870  | NM_020919.1 | 13 | c.4910T>G | p.Arg169Arg | Int | insufficient   |           | 0 | 0 | 0     | 0.986 | 1.5   | 1.55  | 29.1  | 35    | V  |   |
| NP15471   | AS17  | IT0444 | chr2 | 57594870  | NM_020919.1 | 13 | c.4910T>G | p.Arg169Arg | Int | insufficient   |           | 0 | 0 | 0     | 0.986 | 1.5   | 1.55  | 29.1  | 35    | V  |   |
| NP15471   | AS17  | IT0444 | chr2 | 57594870  | NM_020919.1 | 13 | c.4910T>G | p.Arg169Arg | Int | insufficient   |           | 0 | 0 | 0     | 0.986 | 1.5   | 1.55  | 29.1  | 35    | V  |   |
| NP15471   | AS17  | IT0444 | chr2 | 57594870  | NM_020919.1 | 13 | c.4910T>G | p.Arg169Arg | Int | insufficient   |           | 0 | 0 | 0     | 0.986 | 1.5   | 1.55  | 29.1  | 35    | V  |   |
| NP15471   | AS17  | IT0444 | chr2 | 57594870  | NM_020919.1 | 13 | c.4910T>G | p.Arg169Arg | Int | insufficient   |           | 0 | 0 | 0     | 0.986 | 1.5   | 1.55  | 29.1  | 35    | V  |   |
| NP15471   | AS17  | IT0444 | chr2 | 57594870  | NM_020919.1 | 13 | c.4910T>G | p.Arg169Arg | Int | insufficient   |           | 0 | 0 | 0     | 0.986 | 1.5   | 1.55  | 29.1  | 35    | V  |   |
| NP15471   | AS17  | IT0444 | chr2 | 57594870  | NM_020919.1 | 13 | c.4910T>G | p.Arg169Arg | Int | insufficient   |           | 0 | 0 | 0     | 0.986 | 1.5   | 1.55  | 29.1  | 35    | V  |   |
| NP15471   | AS17  | IT0444 | chr2 | 57594870  | NM_020919.1 | 13 | c.4910T>G | p.Arg169Arg | Int | insufficient   |           | 0 | 0 | 0     | 0.986 | 1.5   | 1.55  | 29.1  | 35    | V  |   |
| NP15471   | AS17  | IT0444 | chr2 | 57594870  | NM_020919.1 | 13 | c.4910T>G | p.Arg169Arg | Int | insufficient   |           | 0 | 0 | 0     | 0.986 | 1.5   | 1.55  | 29.1  | 35    | V  |   |
| NP15471   | AS17  | IT0444 | chr2 | 575       |             |    |           |             |     |                |           |   |   |       |       |       |       |       |       |    |   |

SIFT score cutoff=-0.05, <0.05 deleterious; PPH2 score cutoff=-0.5, >0.5 deleterious; FATHMM score cutoff=-1.5, smaller than -1.5 is predicted as "D(AMAGING)", MA, MutationAssessor, H>3.5, 1.9<M<3.5, 0.8<L<1.9,N<0.8  
HGVS: Human Genome Variation Society; HGMD: Human Gene Mutation Database; SIFT: Sorting Intolerant from Tolerant; PolyPhen-2: Polymorphism Phenotyping v2; FATHMM: Functional Analysis through Hidden Markov Models; CADD: Combined Annotation Dependent Depletion
